# Supplementary material for: Dithiocarbamate-modified cellulose-based sorbents with high storage stability for selective removal of arsenite and hazardous heavy metals
Source: Royal Society of Chemistry journal article supplement (doi:10.1039/d0ra05573e), 2020-01-01
Supplement: d0ra05573e1.pdf [file d0ra05573e1.pdf]

## Electronic Supplementary Information

### Dithiocarbamate-modified cellulose-based sorbents with high storage stability for selective removal of arsenite and hazardous heavy metals

Futo Morita,<sup>†a</sup> Keisuke Nakakubo,<sup>†a</sup> Koki Yunoshita,<sup>†a</sup> Masaru Endo,<sup>a,b</sup> Foni B. Biswas,<sup>a,c</sup> Tatsuya Nishimura,<sup>a</sup> Asami S. Mashio,<sup>a</sup> Hiroshi Hasegawa,<sup>\*a</sup> Tsuyoshi Taniguchi,<sup>\*a</sup> Katsuhiro Maeda<sup>\*a,d</sup>

---

<sup>a</sup>Graduate School of Natural Science and Technology, Kanazawa University, Kakuma-machi, Kanazawa 920-1192, Japan.

<sup>b</sup>Daicel Corporation, 1239 Shinzaike, Aboshi-ku, Himeji, Hyogo 671-1283, Japan.

<sup>c</sup>Department of Chemistry, University of Chittagong, Chittagong 4331, Bangladesh.

<sup>d</sup>Nano Life Science Institute (WPI-NanoLSI), Kanazawa University, Kakuma-machi, Kanazawa 920-1192, Japan.

E-mail: [hhiroshi@se.kanazawa-u.ac.jp](mailto:hhiroshi@se.kanazawa-u.ac.jp), [tsuyoshi@p.kanazawa-u.ac.jp](mailto:tsuyoshi@p.kanazawa-u.ac.jp), [maeda@se.kanazawa-u.ac.jp](mailto:maeda@se.kanazawa-u.ac.jp)

<sup>†</sup>These authors contributed equally.

### Table of Contents

|                                                                     |    |
|---------------------------------------------------------------------|----|
| 1. The result of batch sorption experiments for various metals..... | S2 |
| 2. IR Spectra of DTC compounds.....                                 | S3 |
| 3. References.....                                                  | S7 |
| 4. Copies of NMR spectra of synthesized compounds.....              | S8 |

## 1. The result of batch sorption experiments for various metals

| Metal   | Removal (%)   | Metal   | Removal (%)     | Metal   | Removal (%)     |
|---------|---------------|---------|-----------------|---------|-----------------|
| Be(II)  | $2.0 \pm 1.5$ | Al(III) | 0               | Cu(II)  | $99.6 \pm 0.01$ |
| Mg(II)  | 0             | Ti(IV)  | $95.4 \pm 0.1$  | Zn(II)  | $99.7 \pm 0.04$ |
| Ca(II)  | 0             | V(IV)   | $95.9 \pm 1.6$  | Ga(III) | $93.1 \pm 1.2$  |
| Sr(II)  | $3.3 \pm 0.4$ | Mn(III) | $13.5 \pm 0.9$  | Cd(II)  | $99.5 \pm 0.02$ |
| Ba(II)  | $1.6 \pm 0.6$ | Fe(III) | $97.0 \pm 0.5$  | In(III) | $100 \pm 0.09$  |
| Sc(III) | $3.5 \pm 0.6$ | Co(II)  | $100 \pm 0.1$   | Pb(II)  | $100 \pm 0.8$   |
| Y(III)  | $3.0 \pm 0.3$ | Ni(II)  | $99.6 \pm 0.04$ | Bi(III) | $94.0 \pm 0.6$  |

## 2. IR spectra of DTC compounds

### 2-1. DTC compound 1 (previously reported)<sup>1</sup>

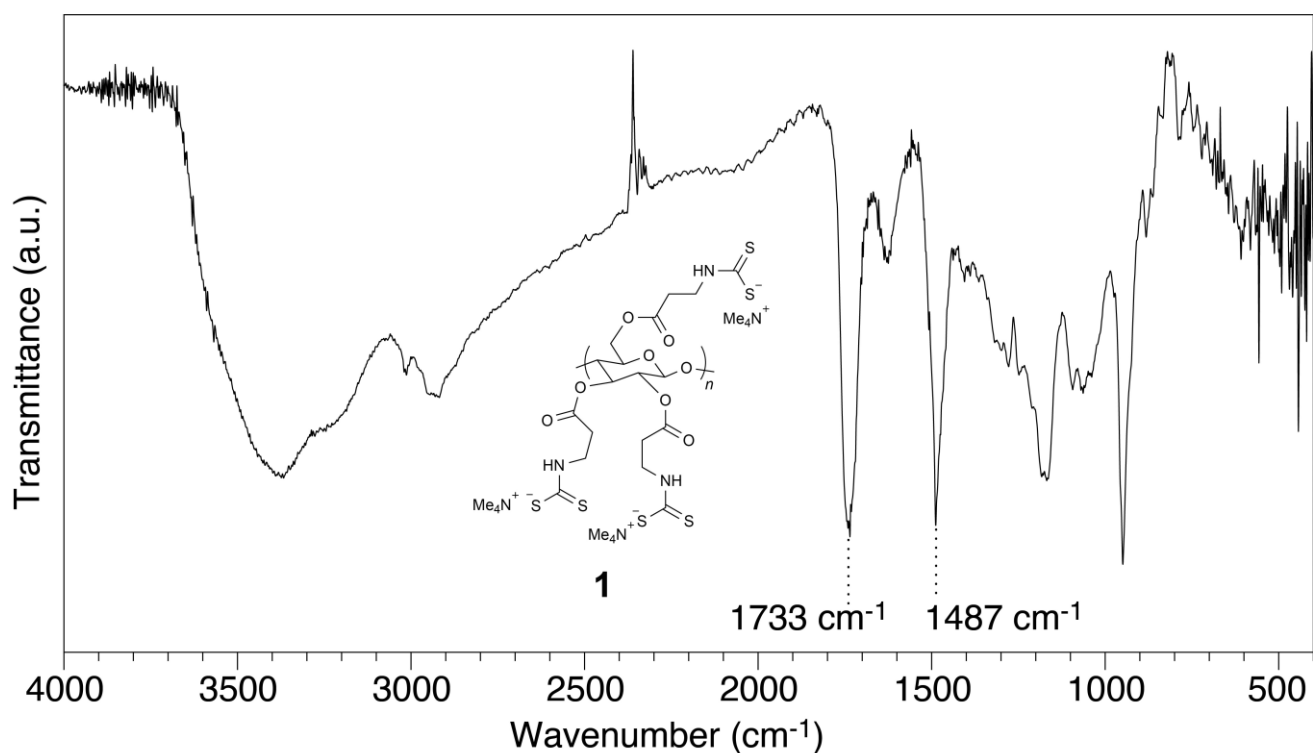

### 2-2. DTC compounds 5a-d

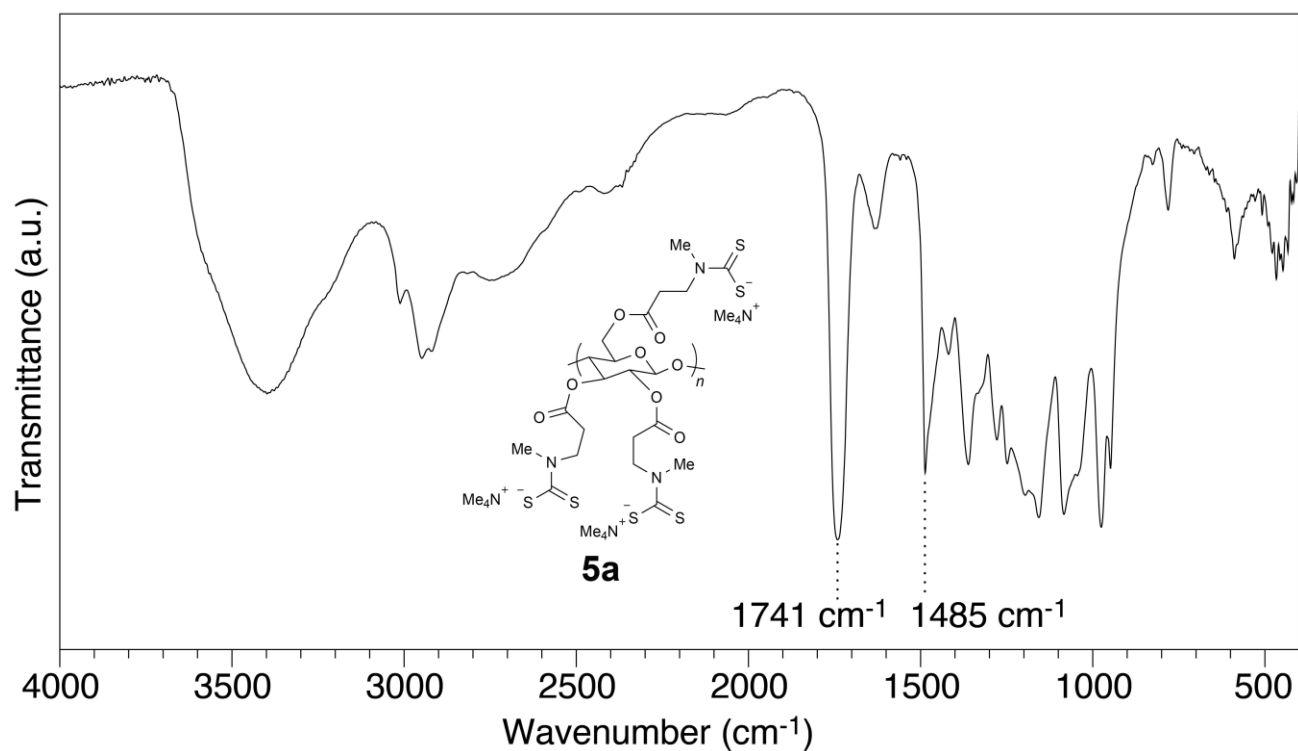

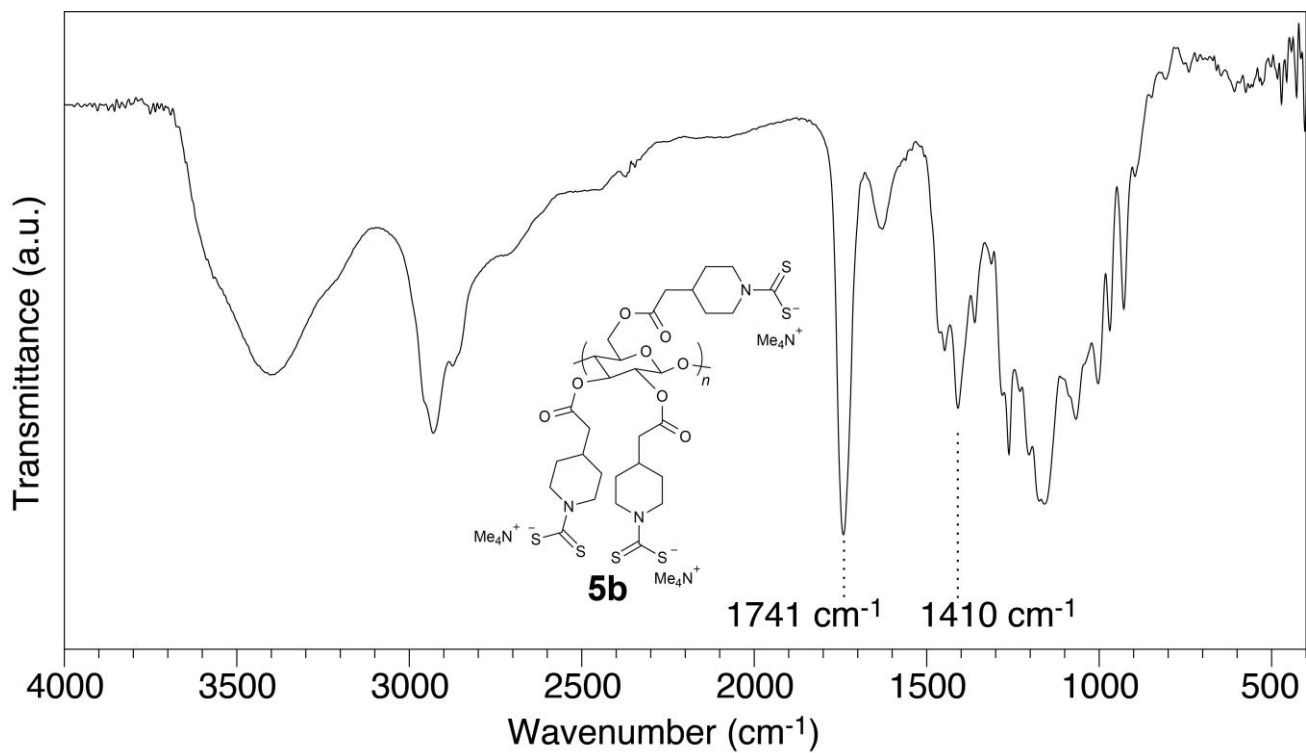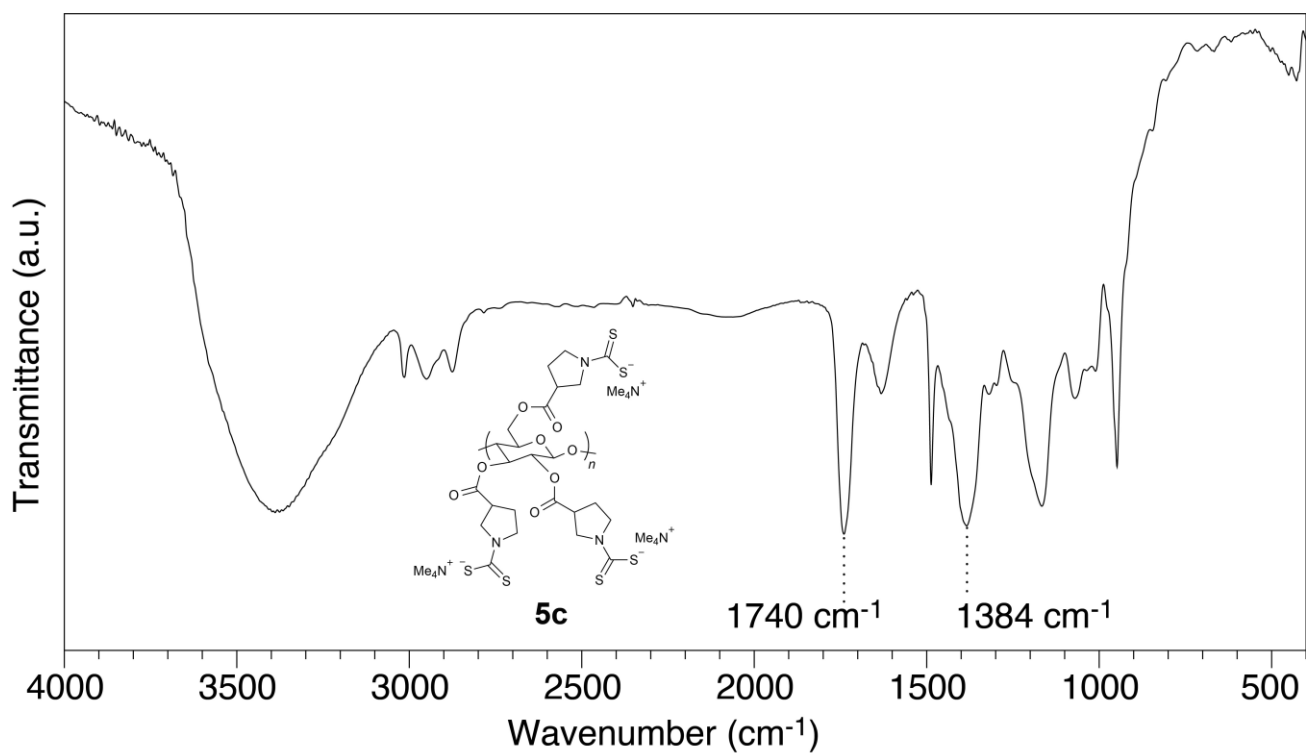

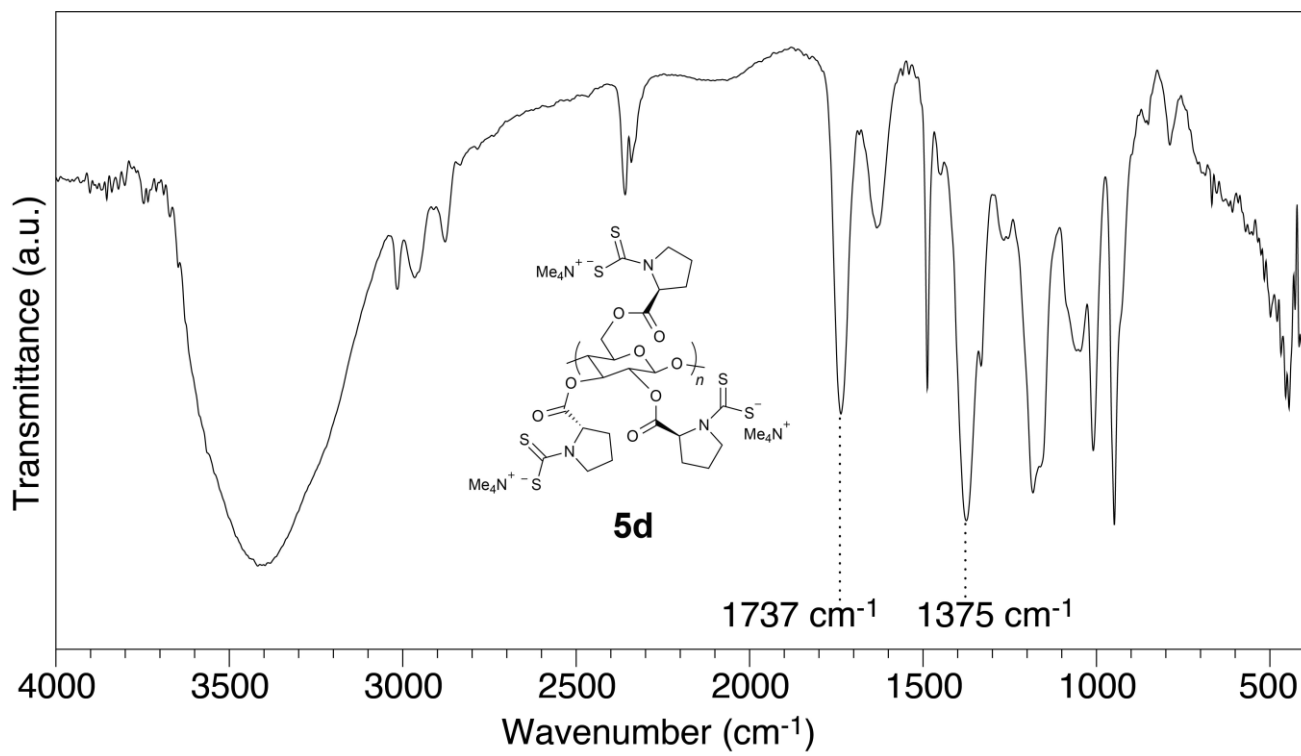

2-3. IR spectra of 1 and 5d after a storage at 40 °C for 2 weeks under air

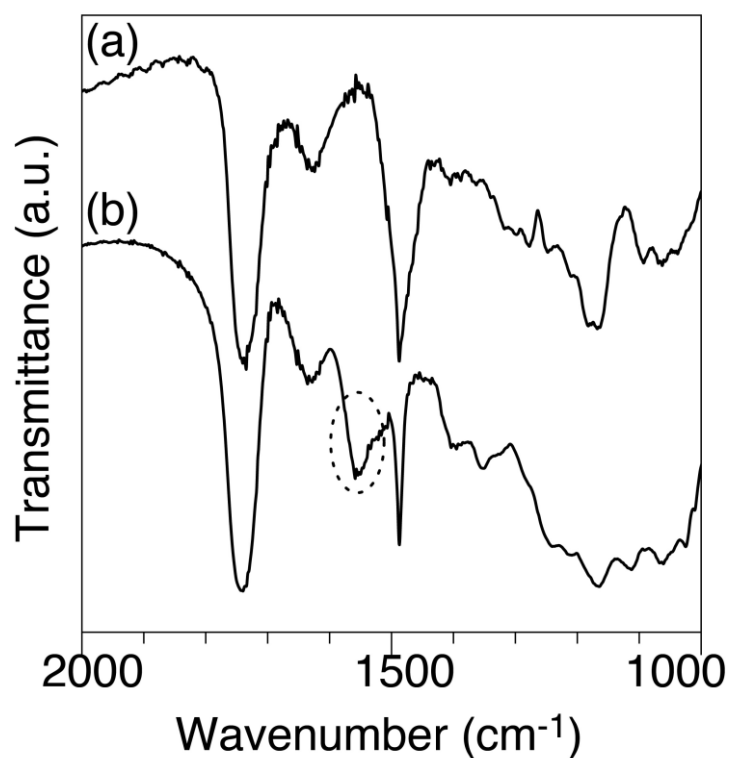

**Fig. S1.** IR spectrum of DTC compound **1** (a) and a new characteristic signal appeared at around 1560 cm<sup>-1</sup> after 2 weeks (b).

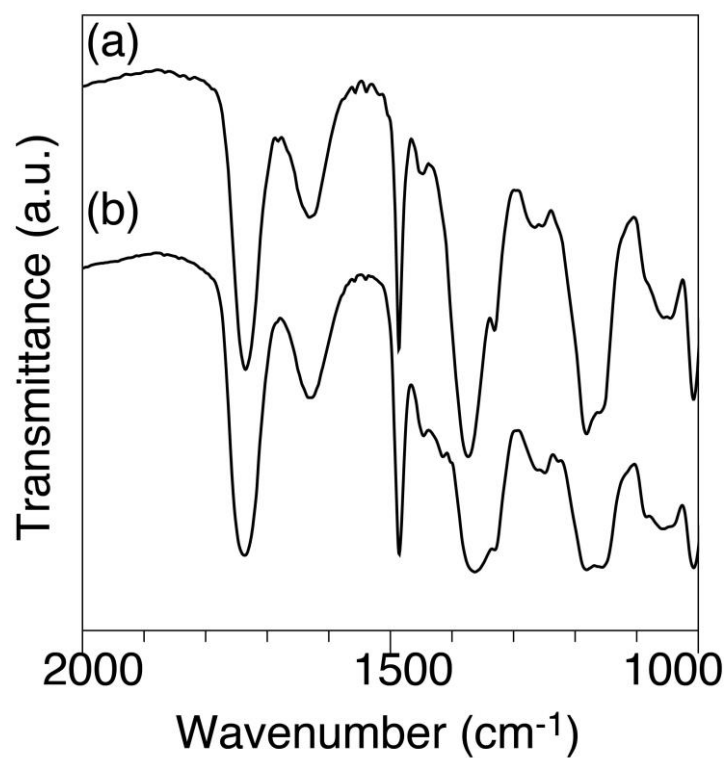

**Fig. S2.** IR spectrum of DTC compound **5d** (a) and the spectrum hardly changed after 2 weeks (b).

### 3. References

1. K. Nakakubo, H. Hasegawa, M. Ito, K. Yamazaki, M. Miyaguchi, F. B. Biswas, T. Ikai and K. Maeda, *J. Hazard. Mater.*, 2019, **380**, 120816.

# 4. Copies of NMR spectra of synthesized compounds

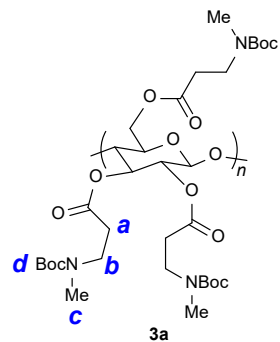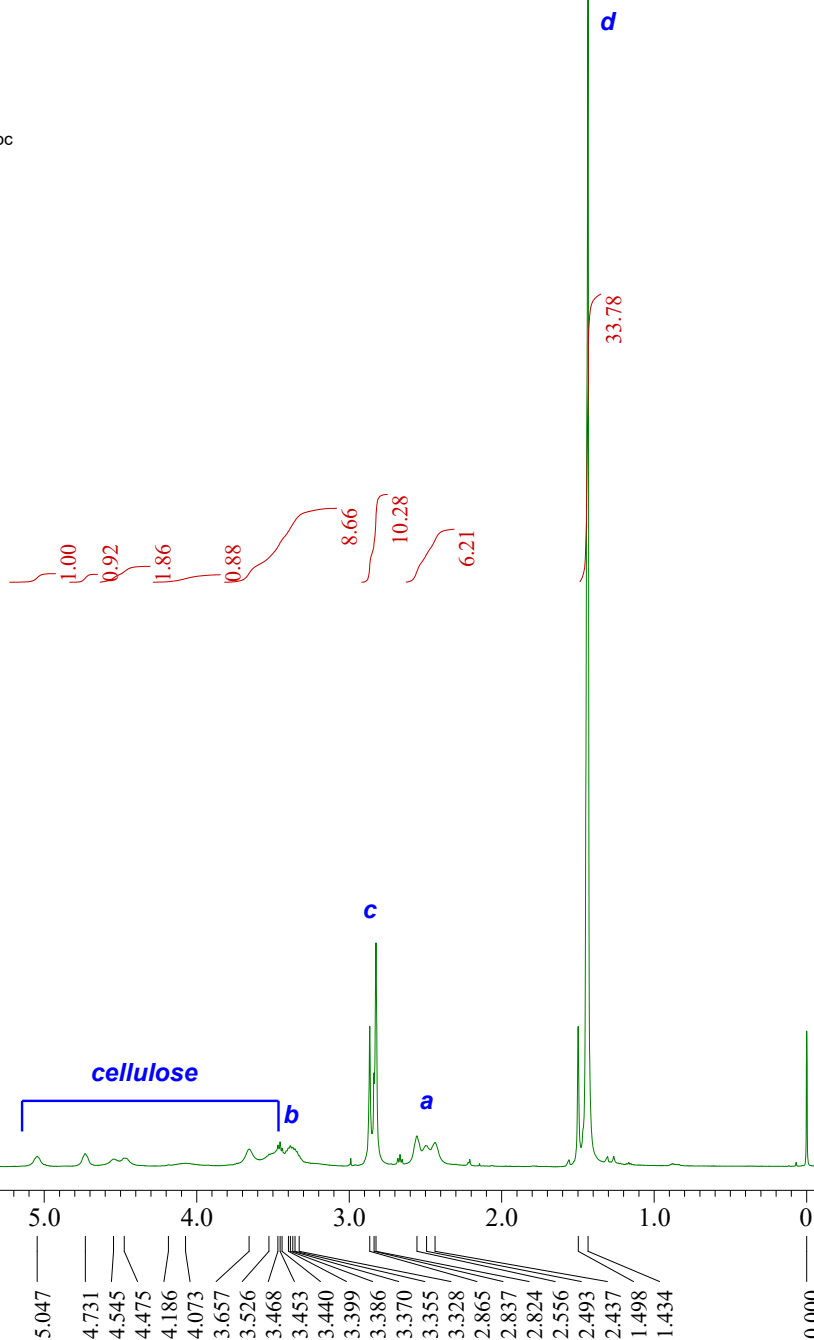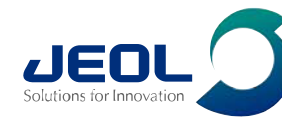

Filename = FM98-cel-2mm-boc-4.jdf  
 Author = delta  
 Experiment = single\_pulse.ex2  
 Sample\_Id = S#415097  
 Solvent = CHLOROFORM-D  
 Creation\_Time = 20-JAN-2020 11:35:39  
 Revision\_Time = 4-JUN-2020 10:41:58  
 Current\_Time = 4-JUN-2020 10:43:02

Comment = FM98-cel-2mm-boc  
 Data\_Format = 1D\_COMPLEX  
 Dim\_Size = 13107  
 Dim\_Title = 1H  
 Dim\_Units = [ppm]  
 Dimensions = X  
 Site = ECA 500  
 Spectrometer = JNM-ECA500

Field\_Strength = 11.7473579[T] (500[MHz])  
 X\_Acq\_Duration = 1.74587904[s]  
 X\_Domain = 1H  
 X\_Freq = 500.15991521[MHz]  
 X\_Offset = 5.0[ppm]  
 X\_Points = 16384  
 X\_Prescans = 1  
 X\_Resolution = 0.57277737[Hz]  
 X\_Sweep = 9.38438438[kHz]  
 Irr\_Domain = 1H  
 Irr\_Freq = 500.15991521[MHz]  
 Irr\_Offset = 5.0[ppm]  
 Tri\_Domain = 1H  
 Tri\_Freq = 500.15991521[MHz]  
 Tri\_Offset = 5.0[ppm]  
 Clipped = FALSE  
 Scans = 256  
 Total\_Scans = 256

Relaxation\_Delay = 2[s]  
 Recvr\_Gain = 54  
 Temp\_Get = 55[dC]  
 X\_90\_Width = 11.6[us]  
 X\_Acq\_Time = 1.74587904[s]  
 X\_Angle = 45[deg]  
 X\_Atn = 3.6[dB]  
 X\_Pulse = 5.8[us]  
 Irr\_Mode = Off  
 Tri\_Mode = Off  
 Dante\_Presat = FALSE  
 Initial\_Wait = 1[s]  
 Repetition\_Time = 3.74587904[s]

X : parts per Million : 1H



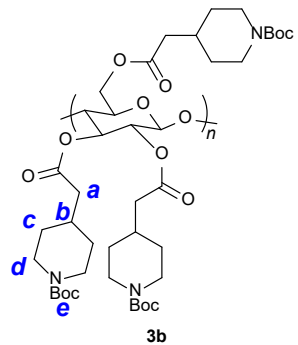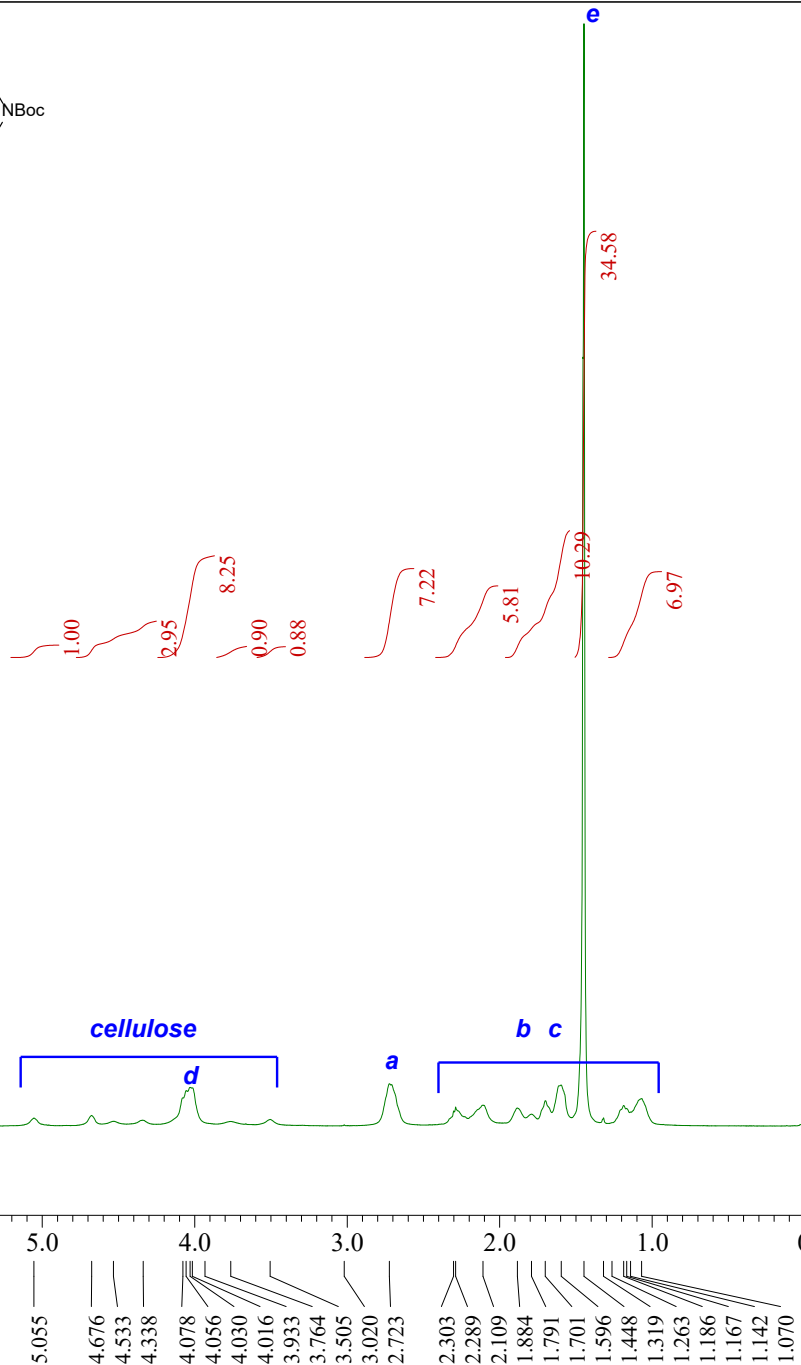

Filename = Me1\_46\_Cy\_ppt2\_dry-5.jdf  
 Author = delta  
 Experiment = single\_pulse.ex2  
 Sample\_Id = S#378546  
 Solvent = CHLOROFORM-D  
 Creation\_Time = 14-FEB-2020 10:18:32  
 Revision\_Time = 4-JUN-2020 11:33:57  
 Current\_Time = 4-JUN-2020 11:34:41

Data\_Format = 1D COMPLEX  
 Dim\_Size = 13107  
 Dim\_Title = 1H  
 Dim\_Units = [ppm]  
 Dimensions = X  
 Site = ECA 500  
 Spectrometer = JNM-ECA500

Field\_Strength = 11.7473579 [T] (500 [MHz])  
 X\_Acq\_Duration = 1.74587904 [s]  
 X\_Domain = 1H  
 X\_Freq = 500.15991521 [MHz]  
 X\_Offset = 5.0 [ppm]  
 X\_Points = 16384  
 X\_Prescans = 1  
 X\_Resolution = 0.57277737 [Hz]  
 X\_Sweep = 9.38438438 [kHz]  
 Irr\_Domain = 1H  
 Irr\_Freq = 500.15991521 [MHz]  
 Irr\_Offset = 5.0 [ppm]  
 Tri\_Domain = 1H  
 Tri\_Freq = 500.15991521 [MHz]  
 Tri\_Offset = 5.0 [ppm]  
 Clipped = FALSE  
 Scans = 66  
 Total\_Scans = 66

Relaxation\_Delay = 2 [s]  
 Recvr\_Gain = 50  
 Temp\_Get = 55 [dC]  
 X\_90\_Width = 11.6 [us]  
 X\_Acq\_Time = 1.74587904 [s]  
 X\_Angle = 45 [deg]  
 X\_Atn = 3.6 [dB]  
 X\_Pulse = 5.8 [us]  
 Irr\_Mode = Off  
 Tri\_Mode = Off  
 Dante\_Presat = FALSE  
 Initial\_Wait = 1 [s]  
 Repetition\_Time = 3.74587904 [s]

X : parts per Million : 1H

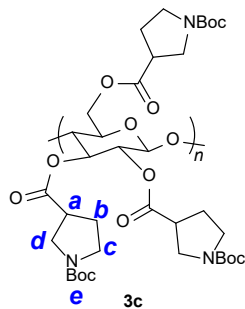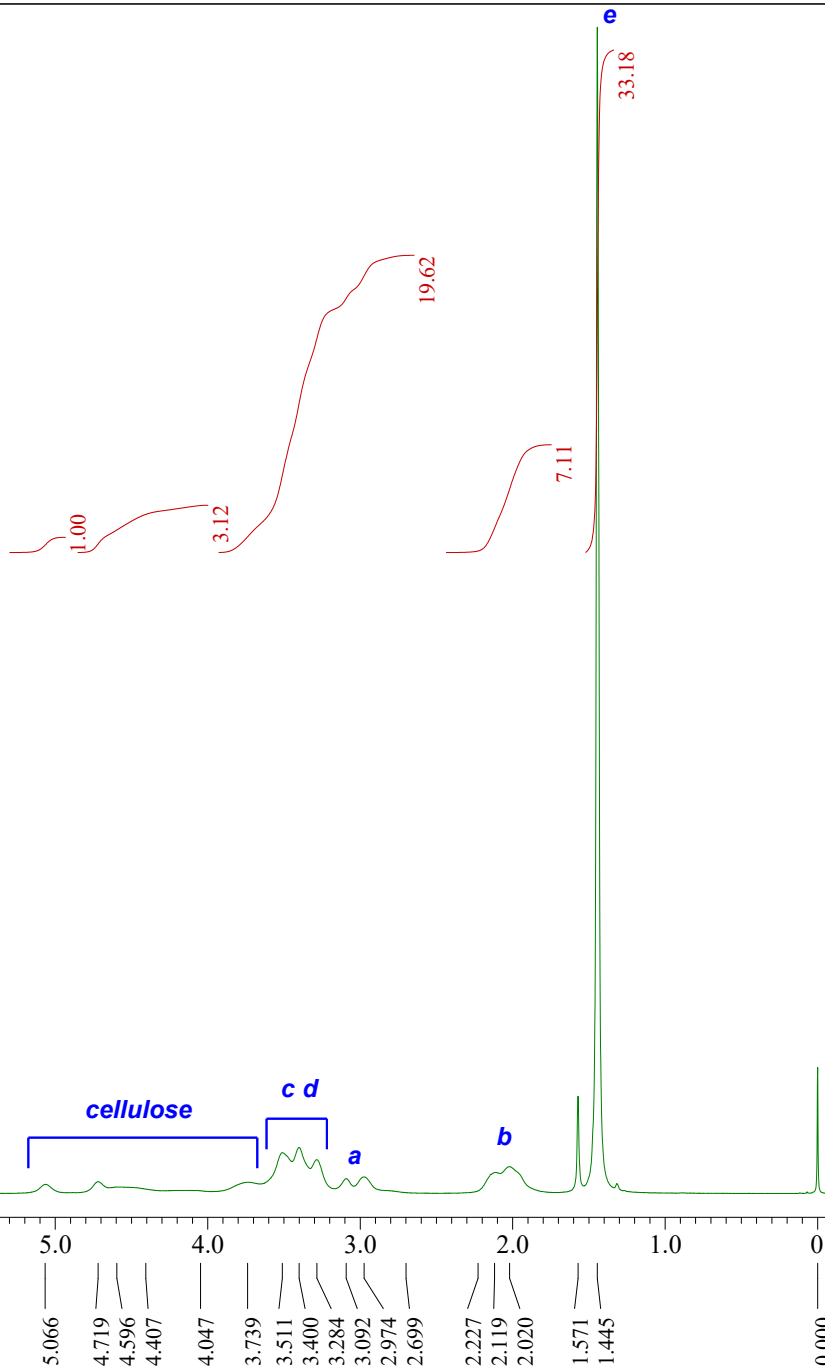

Filename = ME1\_47DMCCy5-3\_ppt3-5.jdf  
 Author = delta  
 Experiment = single\_pulse.ex2  
 Sample\_Id = S#351232  
 Solvent = CHLOROFORM-D  
 Creation\_Time = 13-FEB-2020 09:33:13  
 Revision\_Time = 4-JUN-2020 11:59:51  
 Current\_Time = 4-JUN-2020 12:00:18

Data\_Format = 1D COMPLEX  
 Dim\_Size = 13107  
 Dim\_Title = 1H  
 Dim\_Units = [ppm]  
 Dimensions = X  
 Site = ECA 500  
 Spectrometer = JNM-ECA500

Field\_Strength = 11.7473579 [T] (500 [MHz])  
 X\_Acq\_Duration = 1.74587904 [s]  
 X\_Domain = 1H  
 X\_Freq = 500.15991521 [MHz]  
 X\_Offset = 5.0 [ppm]  
 X\_Points = 16384  
 X\_Prescans = 1  
 X\_Resolution = 0.57277737 [Hz]  
 X\_Sweep = 9.38438438 [kHz]  
 Irr\_Domain = 1H  
 Irr\_Freq = 500.15991521 [MHz]  
 Irr\_Offset = 5.0 [ppm]  
 Tri\_Domain = 1H  
 Tri\_Freq = 500.15991521 [MHz]  
 Tri\_Offset = 5.0 [ppm]  
 Clipped = FALSE  
 Scans = 67  
 Total\_Scans = 67

Relaxation\_Delay = 2 [s]  
 Recvr\_Gain = 48  
 Temp\_Get = 55 [dC]  
 X\_90\_Width = 11.6 [us]  
 X\_Acq\_Time = 1.74587904 [s]  
 X\_Angle = 45 [deg]  
 X\_Atn = 3.6 [dB]  
 X\_Pulse = 5.8 [us]  
 Irr\_Mode = Off  
 Tri\_Mode = Off  
 Dante\_Presat = FALSE  
 Initial\_Wait = 1 [s]  
 Repetition\_Time = 3.74587904 [s]

X : parts per Million : 1H

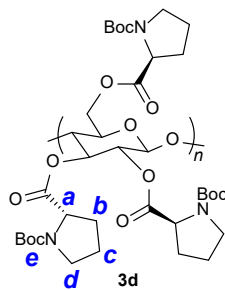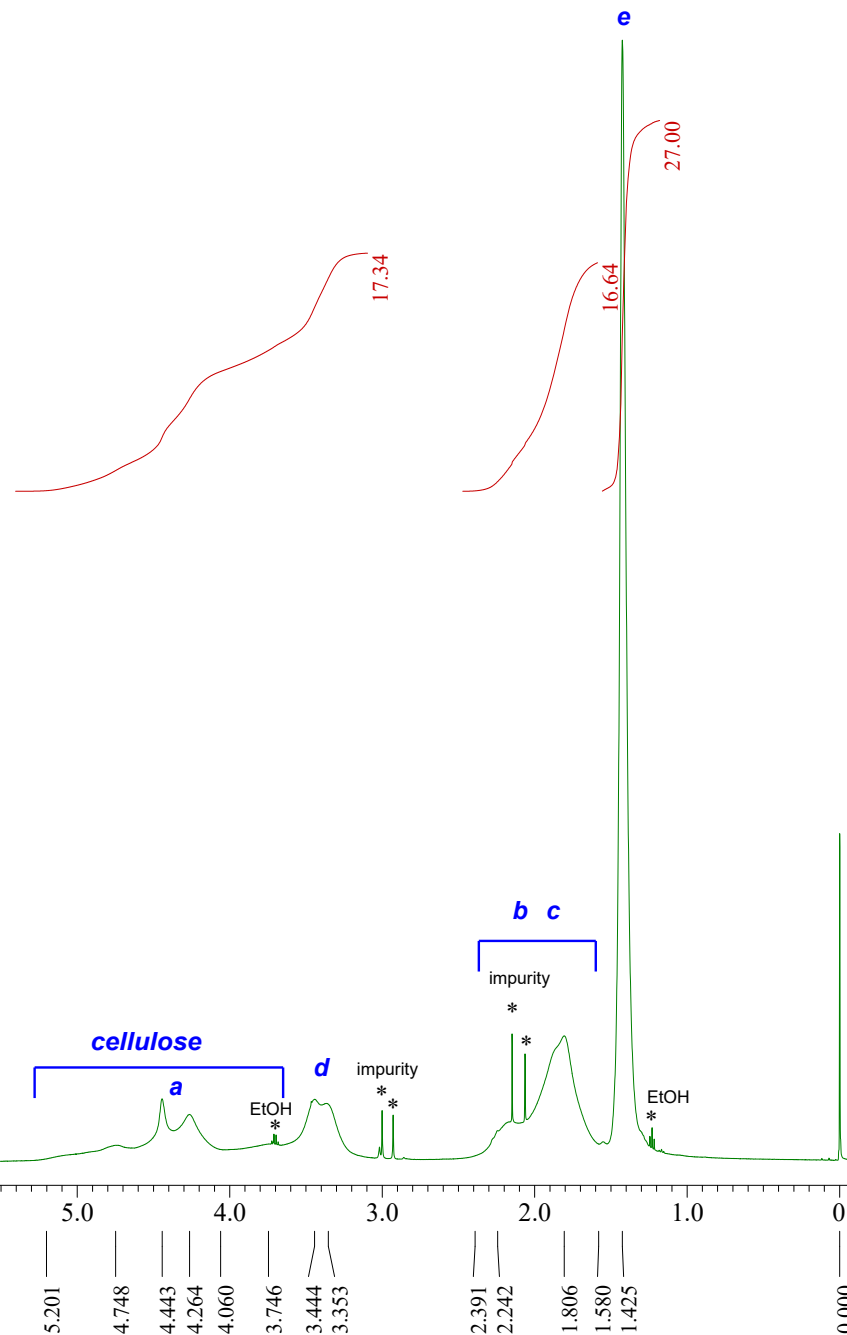

|                  |                            |
|------------------|----------------------------|
| Filename         | = ME1_44_ppt3-5.jdf        |
| Author           | = delta                    |
| Experiment       | = single_pulse.ex2         |
| Sample_Id        | = S#685130                 |
| Solvent          | = CHLOROFORM-D             |
| Creation_Time    | = 6-FEB-2020 18:54:53      |
| Revision_Time    | = 4-JUN-2020 12:15:47      |
| Current_Time     | = 4-JUN-2020 12:16:47      |
| Data_Format      | = 1D_COMPLEX               |
| Dim_Size         | = 13107                    |
| Dim_Title        | = 1H                       |
| Dim_Units        | = [ppm]                    |
| Dimensions       | = X                        |
| Site             | = ECA 500                  |
| Spectrometer     | = JNM-ECA500               |
| Field_Strength   | = 11.7473579[T] (500[MHz]) |
| X_Acq_Duration   | = 1.74587904[s]            |
| X_Domain         | = 1H                       |
| X_Freq           | = 500.15991521[MHz]        |
| X_Offset         | = 5.0[ppm]                 |
| X_Points         | = 16384                    |
| X_Prescans       | = 1                        |
| X_Resolution     | = 0.57277737[Hz]           |
| X_Sweep          | = 9.38438438[kHz]          |
| Irr_Domain       | = 1H                       |
| Irr_Freq         | = 500.15991521[MHz]        |
| Irr_Offset       | = 5.0[ppm]                 |
| Tri_Domain       | = 1H                       |
| Tri_Freq         | = 500.15991521[MHz]        |
| Tri_Offset       | = 5.0[ppm]                 |
| Clipped          | = FALSE                    |
| Scans            | = 80                       |
| Total_Scans      | = 80                       |
| Relaxation_Delay | = 2[s]                     |
| Recvr_Gain       | = 44                       |
| Temp_Get         | = 55[dC]                   |
| X_90_Width       | = 11.6[us]                 |
| X_Acq_Time       | = 1.74587904[s]            |
| X_Angle          | = 45[deg]                  |
| X_Atn            | = 3.6[dB]                  |
| X_Pulse          | = 5.8[us]                  |
| Irr_Mode         | = Off                      |
| Tri_Mode         | = Off                      |
| Dante_Presat     | = FALSE                    |
| Initial_Wait     | = 1[s]                     |
| Repetition_Time  | = 3.74587904[s]            |

X : parts per Million : 1H

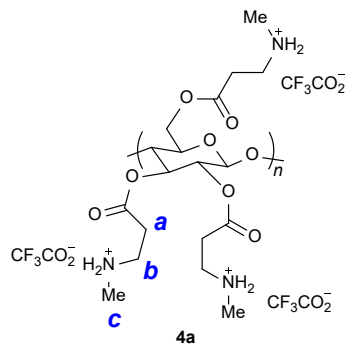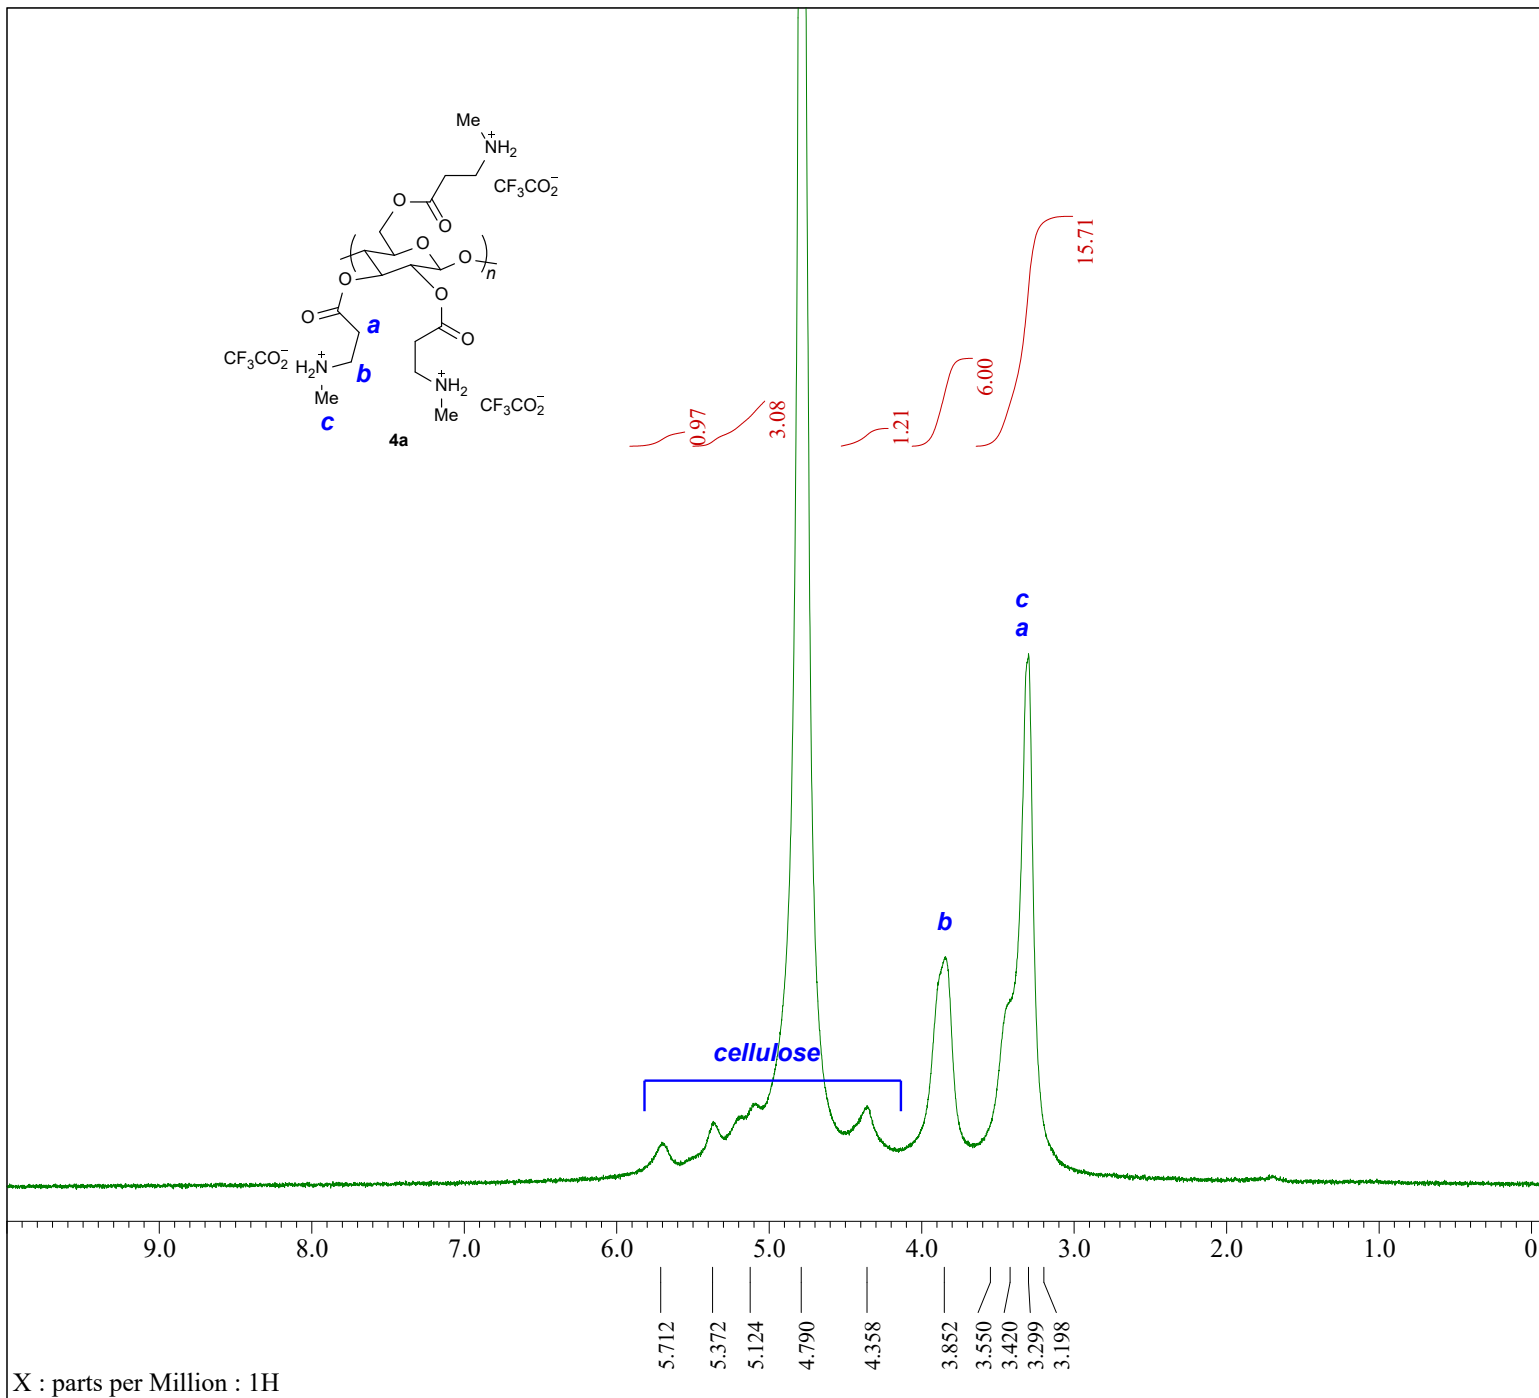

Filename = FM113-cel-2mm-tfa-4.jdf  
 Author = delta  
 Experiment = single\_pulse.ex2  
 Sample\_Id = S#437940  
 Solvent = D2O  
 Creation\_Time = 13-FEB-2020 12:09:32  
 Revision\_Time = 4-JUN-2020 13:33:17  
 Current\_Time = 4-JUN-2020 13:33:47

Data\_Format = 1D COMPLEX  
 Dim\_Size = 13107  
 Dim\_Title = 1H  
 Dim\_Units = [ppm]  
 Dimensions = X  
 Site = ECA 500  
 Spectrometer = JNM-ECA500

Field\_Strength = 11.7473579 [T] (500 [MHz])  
 X\_Acq\_Duration = 1.74587904 [s]  
 X\_Domain = 1H  
 X\_Freq = 500.15991521 [MHz]  
 X\_Offset = 5.0 [ppm]  
 X\_Points = 16384  
 X\_Prescans = 1  
 X\_Resolution = 0.57277737 [Hz]  
 X\_Sweep = 9.38438438 [kHz]  
 Irr\_Domain = 1H  
 Irr\_Freq = 500.15991521 [MHz]  
 Irr\_Offset = 5.0 [ppm]  
 Tri\_Domain = 1H  
 Tri\_Freq = 500.15991521 [MHz]  
 Tri\_Offset = 5.0 [ppm]  
 Clipped = FALSE  
 Scans = 256  
 Total\_Scans = 256

Relaxation\_Delay = 2 [s]  
 Recvr\_Gain = 66  
 Temp\_Get = 80 [dC]  
 X\_90\_Width = 11.6 [us]  
 X\_Acq\_Time = 1.74587904 [s]  
 X\_Angle = 45 [deg]  
 X\_Atn = 3.6 [dB]  
 X\_Pulse = 5.8 [us]  
 Irr\_Mode = Off  
 Tri\_Mode = Off  
 Dante\_Presat = FALSE  
 Initial\_Wait = 1 [s]  
 Repetition\_Time = 3.74587904 [s]

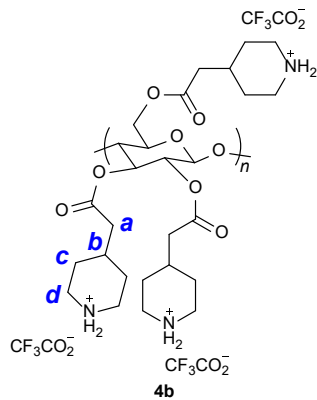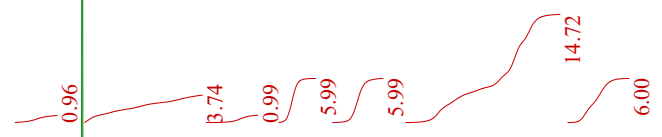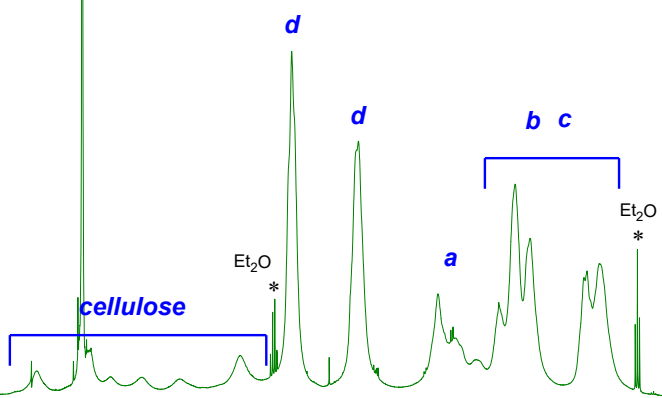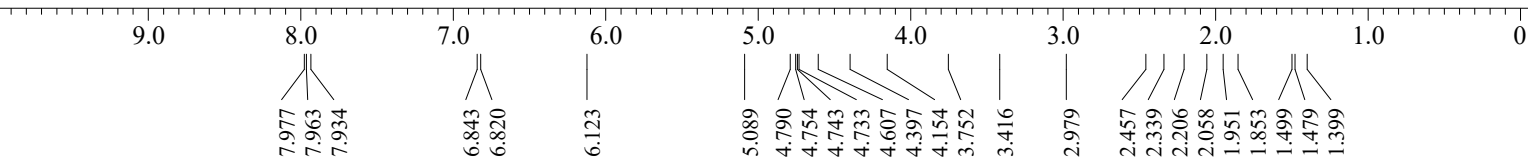

X : parts per Million : 1H

|                  |                              |
|------------------|------------------------------|
| Filename         | = ME1_29_recry_200413_D20-5. |
| Author           | = delta                      |
| Experiment       | = single_pulse.ex2           |
| Sample_Id        | = S#348941                   |
| Solvent          | = D2O                        |
| Creation_Time    | = 13-APR-2020 09:27:40       |
| Revision_Time    | = 4-JUN-2020 13:54:29        |
| Current_Time     | = 4-JUN-2020 13:55:12        |
|                  |                              |
| Data_Format      | = 1D COMPLEX                 |
| Dim_Size         | = 13107                      |
| Dim_Title        | = 1H                         |
| Dim_Units        | = [ppm]                      |
| Dimensions       | = X                          |
| Site             | = ECA 500                    |
| Spectrometer     | = JNM-ECA500                 |
|                  |                              |
| Field_Strength   | = 11.7473579 [T] (500 [MHz]) |
| X_Acq_Duration   | = 1.74587904 [s]             |
| X_Domain         | = 1H                         |
| X_Freq           | = 500.15991521 [MHz]         |
| X_Offset         | = 5.0 [ppm]                  |
| X_Points         | = 16384                      |
| X_Prescans       | = 1                          |
| X_Resolution     | = 0.57277737 [Hz]            |
| X_Sweep          | = 9.38438438 [kHz]           |
| Irr_Domain       | = 1H                         |
| Irr_Freq         | = 500.15991521 [MHz]         |
| Irr_Offset       | = 5.0 [ppm]                  |
| Tri_Domain       | = 1H                         |
| Tri_Freq         | = 500.15991521 [MHz]         |
| Tri_Offset       | = 5.0 [ppm]                  |
| Clipped          | = FALSE                      |
| Scans            | = 64                         |
| Total_Scans      | = 64                         |
|                  |                              |
| Relaxation_Delay | = 2 [s]                      |
| Recvr_Gain       | = 40                         |
| Temp_Get         | = 19.4 [dC]                  |
| X_90_Width       | = 11.4 [us]                  |
| X_Acq_Time       | = 1.74587904 [s]             |
| X_Angle          | = 45 [deg]                   |
| X_Atn            | = 3.6 [dB]                   |
| X_Pulse          | = 5.7 [us]                   |
| Irr_Mode         | = Off                        |
| Tri_Mode         | = Off                        |
| Dante_Presat     | = FALSE                      |
| Initial_Wait     | = 1 [s]                      |
| Repetition_Time  | = 3.74587904 [s]             |

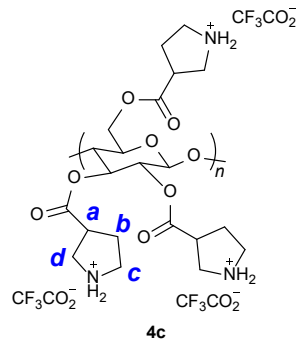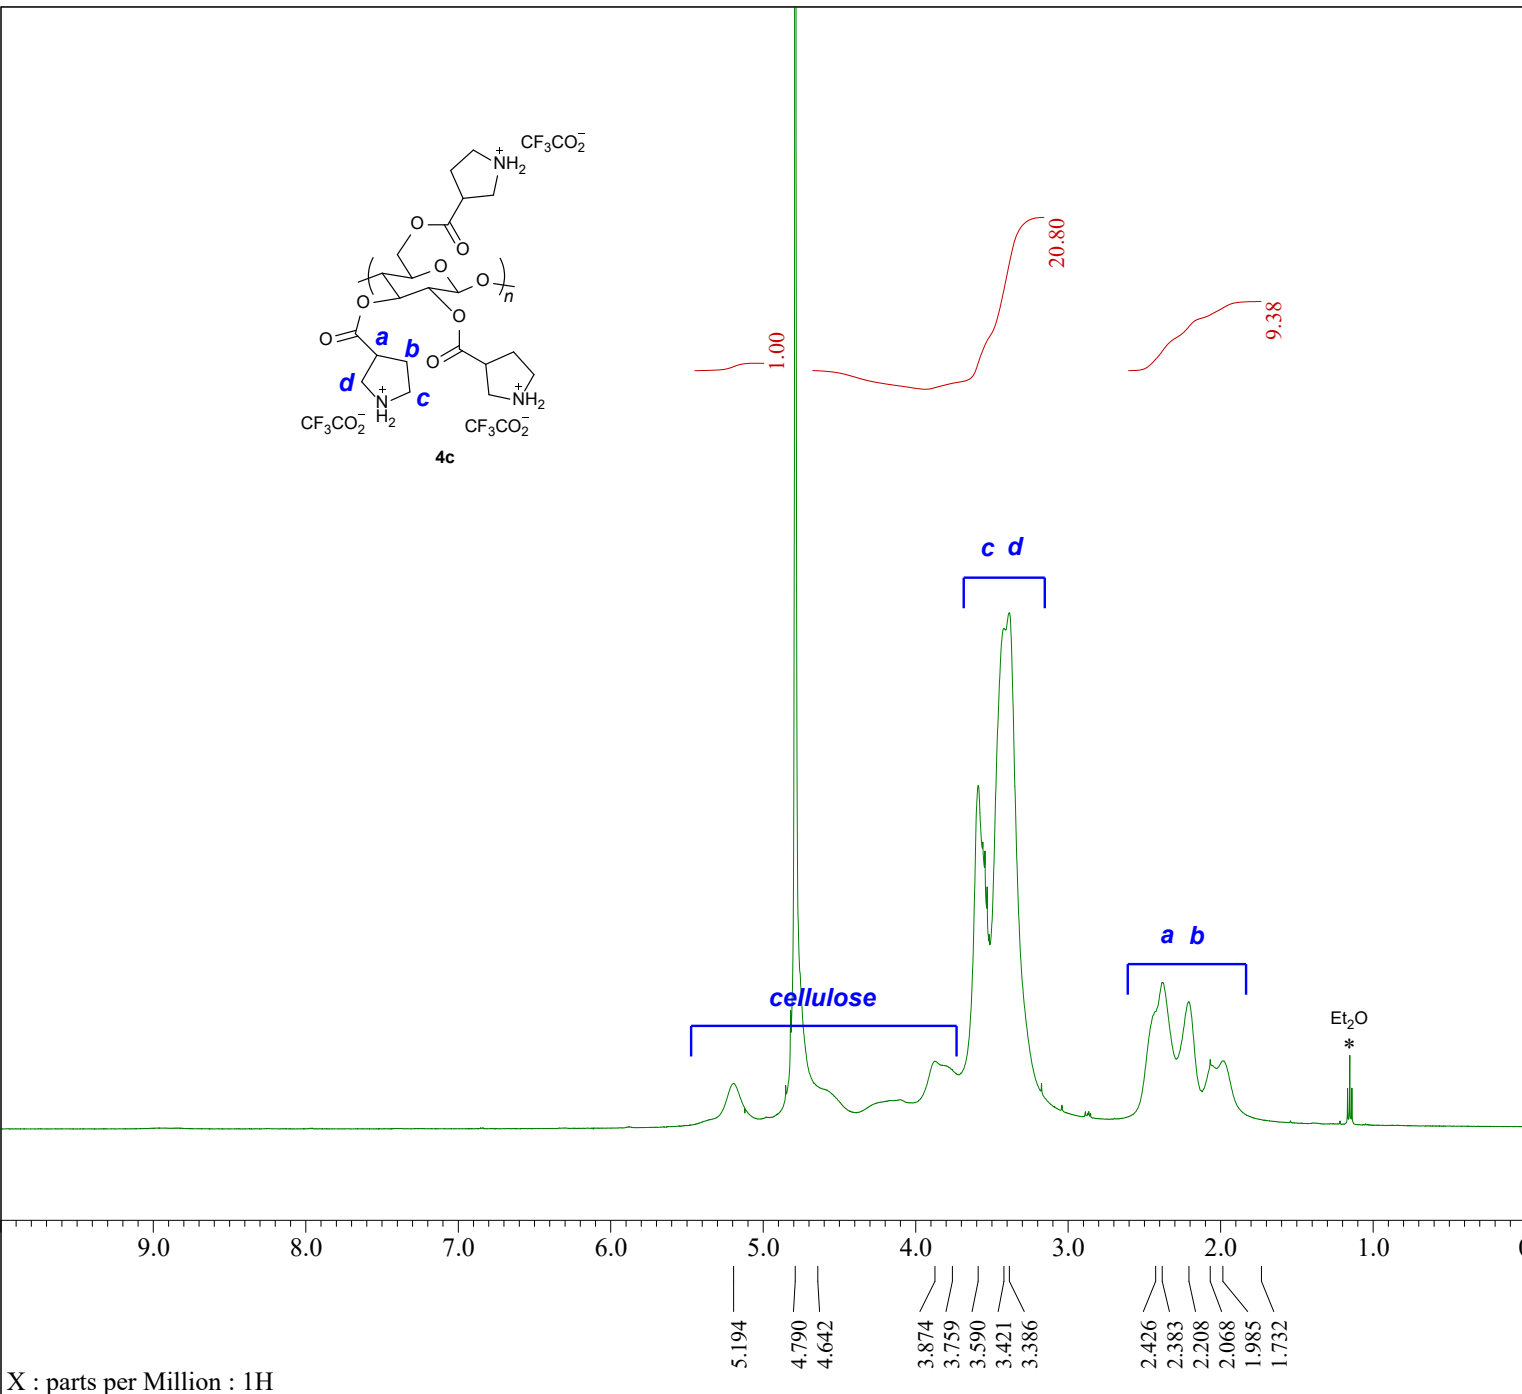

Filename = ME\_1\_64\_Cy5-3TFA\_ppt2-4.jd  
 Author = delta  
 Experiment = single\_pulse.ex2  
 Sample\_Id = S#326593  
 Solvent = D2O  
 Creation\_Time = 22-APR-2020 08:50:28  
 Revision\_Time = 4-JUN-2020 14:07:47  
 Current\_Time = 4-JUN-2020 14:08:15

Data\_Format = 1D\_COMPLEX  
 Dim\_Size = 13107  
 Dim\_Title = 1H  
 Dim\_Units = [ppm]  
 Dimensions = X  
 Site = ECA 500  
 Spectrometer = JNM-ECA500

Field\_Strength = 11.7473579 [T] (500 [MHz])  
 X\_Acq\_Duration = 1.74587904 [s]  
 X\_Domain = 1H  
 X\_Freq = 500.15991521 [MHz]  
 X\_Offset = 5.0 [ppm]  
 X\_Points = 16384  
 X\_Prescans = 1  
 X\_Resolution = 0.57277737 [Hz]  
 X\_Sweep = 9.38438438 [kHz]  
 Irr\_Domain = 1H  
 Irr\_Freq = 500.15991521 [MHz]  
 Irr\_Offset = 5.0 [ppm]  
 Tri\_Domain = 1H  
 Tri\_Freq = 500.15991521 [MHz]  
 Tri\_Offset = 5.0 [ppm]  
 Clipped = FALSE  
 Scans = 64  
 Total\_Scans = 64

Relaxation\_Delay = 2 [s]  
 Recvr\_Gain = 36  
 Temp\_Get = 20.6 [dC]  
 X\_90\_Width = 11.4 [us]  
 X\_Acq\_Time = 1.74587904 [s]  
 X\_Angle = 45 [deg]  
 X\_Atn = 3.6 [dB]  
 X\_Pulse = 5.7 [us]  
 Irr\_Mode = Off  
 Tri\_Mode = Off  
 Dante\_Presat = FALSE  
 Initial\_Wait = 1 [s]  
 Repetition\_Time = 3.74587904 [s]

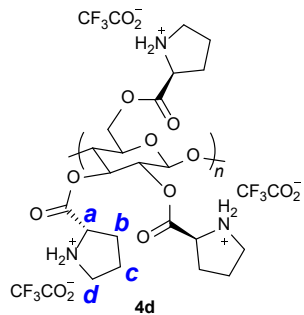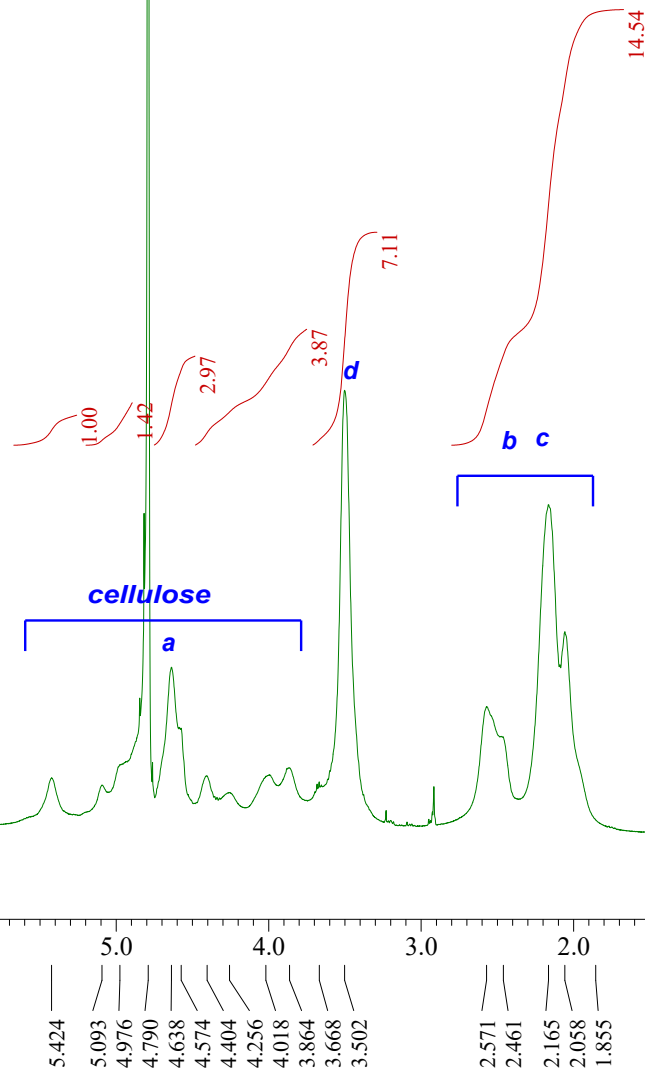

Filename = ME1\_66\_Pro\_TFA\_ppt2-4.jdf  
 Author = delta  
 Experiment = single\_pulse.ex2  
 Sample\_Id = S#340008  
 Solvent = D2O  
 Creation\_Time = 27-APR-2020 09:12:52  
 Revision\_Time = 4-JUN-2020 14:39:03  
 Current\_Time = 4-JUN-2020 14:39:39

Data\_Format = 1D COMPLEX  
 Dim\_Size = 13107  
 Dim\_Title = 1H  
 Dim\_Units = [ppm]  
 Dimensions = X  
 Site = ECA 500  
 Spectrometer = JNM-ECA500

Field\_Strength = 11.7473579 [T] (500 [MHz])  
 X\_Acq\_Duration = 1.74587904 [s]  
 X\_Domain = 1H  
 X\_Freq = 500.15991521 [MHz]  
 X\_Offset = 5.0 [ppm]  
 X\_Points = 16384  
 X\_Prescans = 1  
 X\_Resolution = 0.57277737 [Hz]  
 X\_Sweep = 9.38438438 [kHz]  
 Irr\_Domain = 1H  
 Irr\_Freq = 500.15991521 [MHz]  
 Irr\_Offset = 5.0 [ppm]  
 Tri\_Domain = 1H  
 Tri\_Freq = 500.15991521 [MHz]  
 Tri\_Offset = 5.0 [ppm]  
 Clipped = FALSE  
 Scans = 64  
 Total\_Scans = 64

Relaxation\_Delay = 2 [s]  
 Recvr\_Gain = 40  
 Temp\_Get = 25.2 [dC]  
 X\_90\_Width = 11.4 [us]  
 X\_Acq\_Time = 1.74587904 [s]  
 X\_Angle = 45 [deg]  
 X\_Atn = 3.6 [dB]  
 X\_Pulse = 5.7 [us]  
 Irr\_Mode = Off  
 Tri\_Mode = Off  
 Dante\_Presat = FALSE  
 Initial\_Wait = 1 [s]  
 Repetition\_Time = 3.74587904 [s]

X : parts per Million : 1H

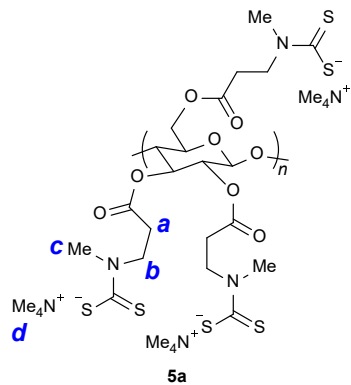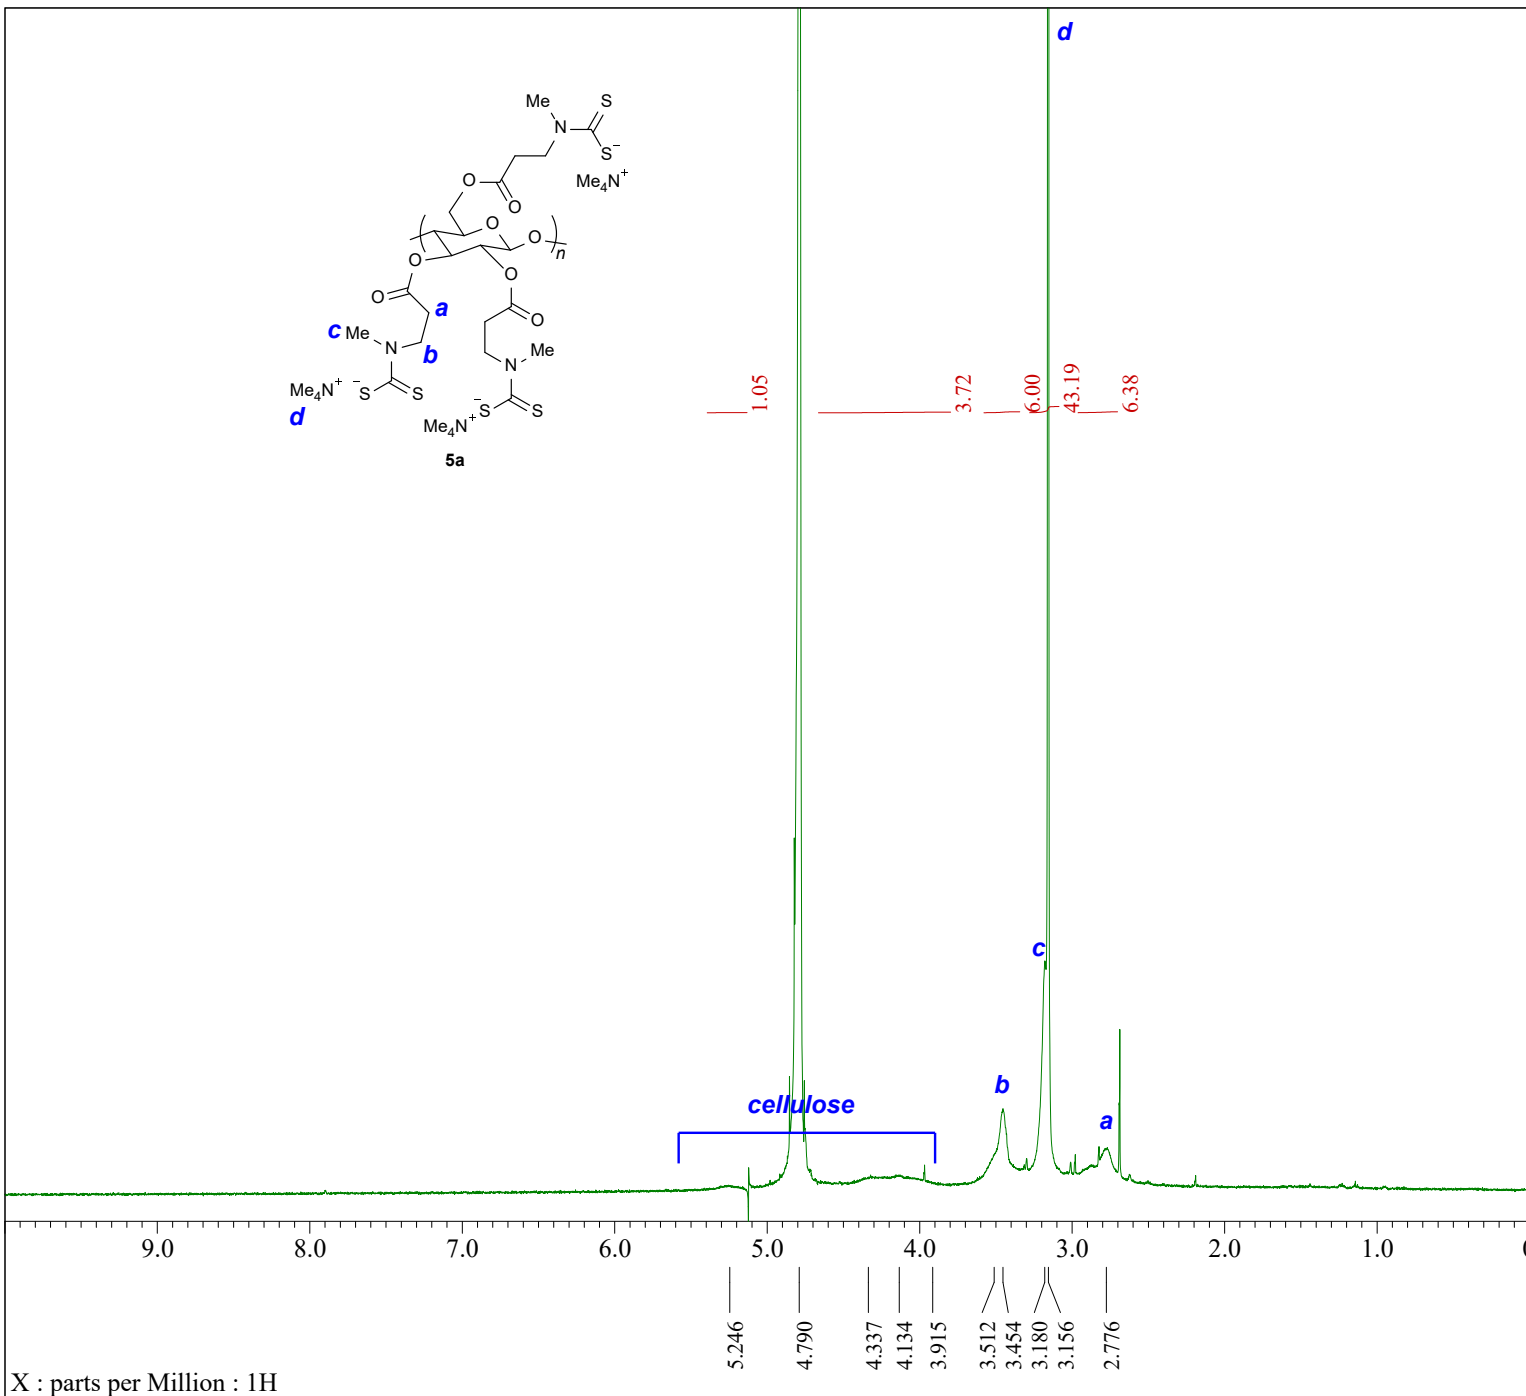

Filename = 5a-2.jdf  
 Author = delta  
 Experiment = single\_pulse.ex2  
 Sample\_Id = S#683558  
 Solvent = D2O  
 Creation\_Time = 7-MAR-2020 18:58:57  
 Revision\_Time = 5-JUN-2020 15:45:34  
 Current\_Time = 5-JUN-2020 15:46:13  
  
 Comment = FM115-cel-2mm-dtc-dry  
 Data\_Format = 1D\_COMPLEX  
 Dim\_Size = 13107  
 Dim\_Title = 1H  
 Dim\_Units = [ppm]  
 Dimensions = X  
 Site = ECA 500  
 Spectrometer = JNM-ECA500  
  
 Field\_Strength = 11.7473579[T] (500[MHz])  
 X\_Acq\_Duration = 1.74587904[s]  
 X\_Domain = 1H  
 X\_Freq = 500.15991521[MHz]  
 X\_Offset = 5.0[ppm]  
 X\_Points = 16384  
 X\_Prescans = 1  
 X\_Resolution = 0.57277737[Hz]  
 X\_Sweep = 9.38438438[kHz]  
 Irr\_Domain = 1H  
 Irr\_Freq = 500.15991521[MHz]  
 Irr\_Offset = 5.0[ppm]  
 Tri\_Domain = 1H  
 Tri\_Freq = 500.15991521[MHz]  
 Tri\_Offset = 5.0[ppm]  
 Clipped = FALSE  
 Scans = 256  
 Total\_Scans = 256  
  
 Relaxation\_Delay = 2[s]  
 Recvr\_Gain = 54  
 Temp\_Get = 20.1[dC]  
 X\_90\_Width = 11.6[us]  
 X\_Acq\_Time = 1.74587904[s]  
 X\_Angle = 45[deg]  
 X\_Atn = 3.6[dB]  
 X\_Pulse = 5.8[us]  
 Irr\_Mode = Off  
 Tri\_Mode = Off  
 Dante\_Presat = FALSE  
 Initial\_Wait = 1[s]  
 Repetition\_Time = 3.74587904[s]

X : parts per Million : 1H



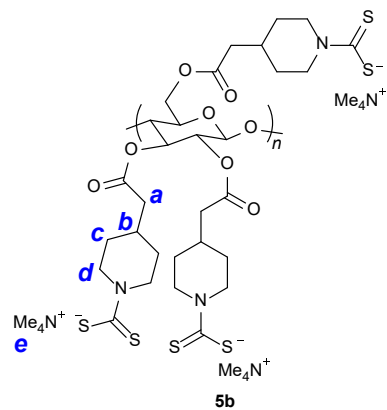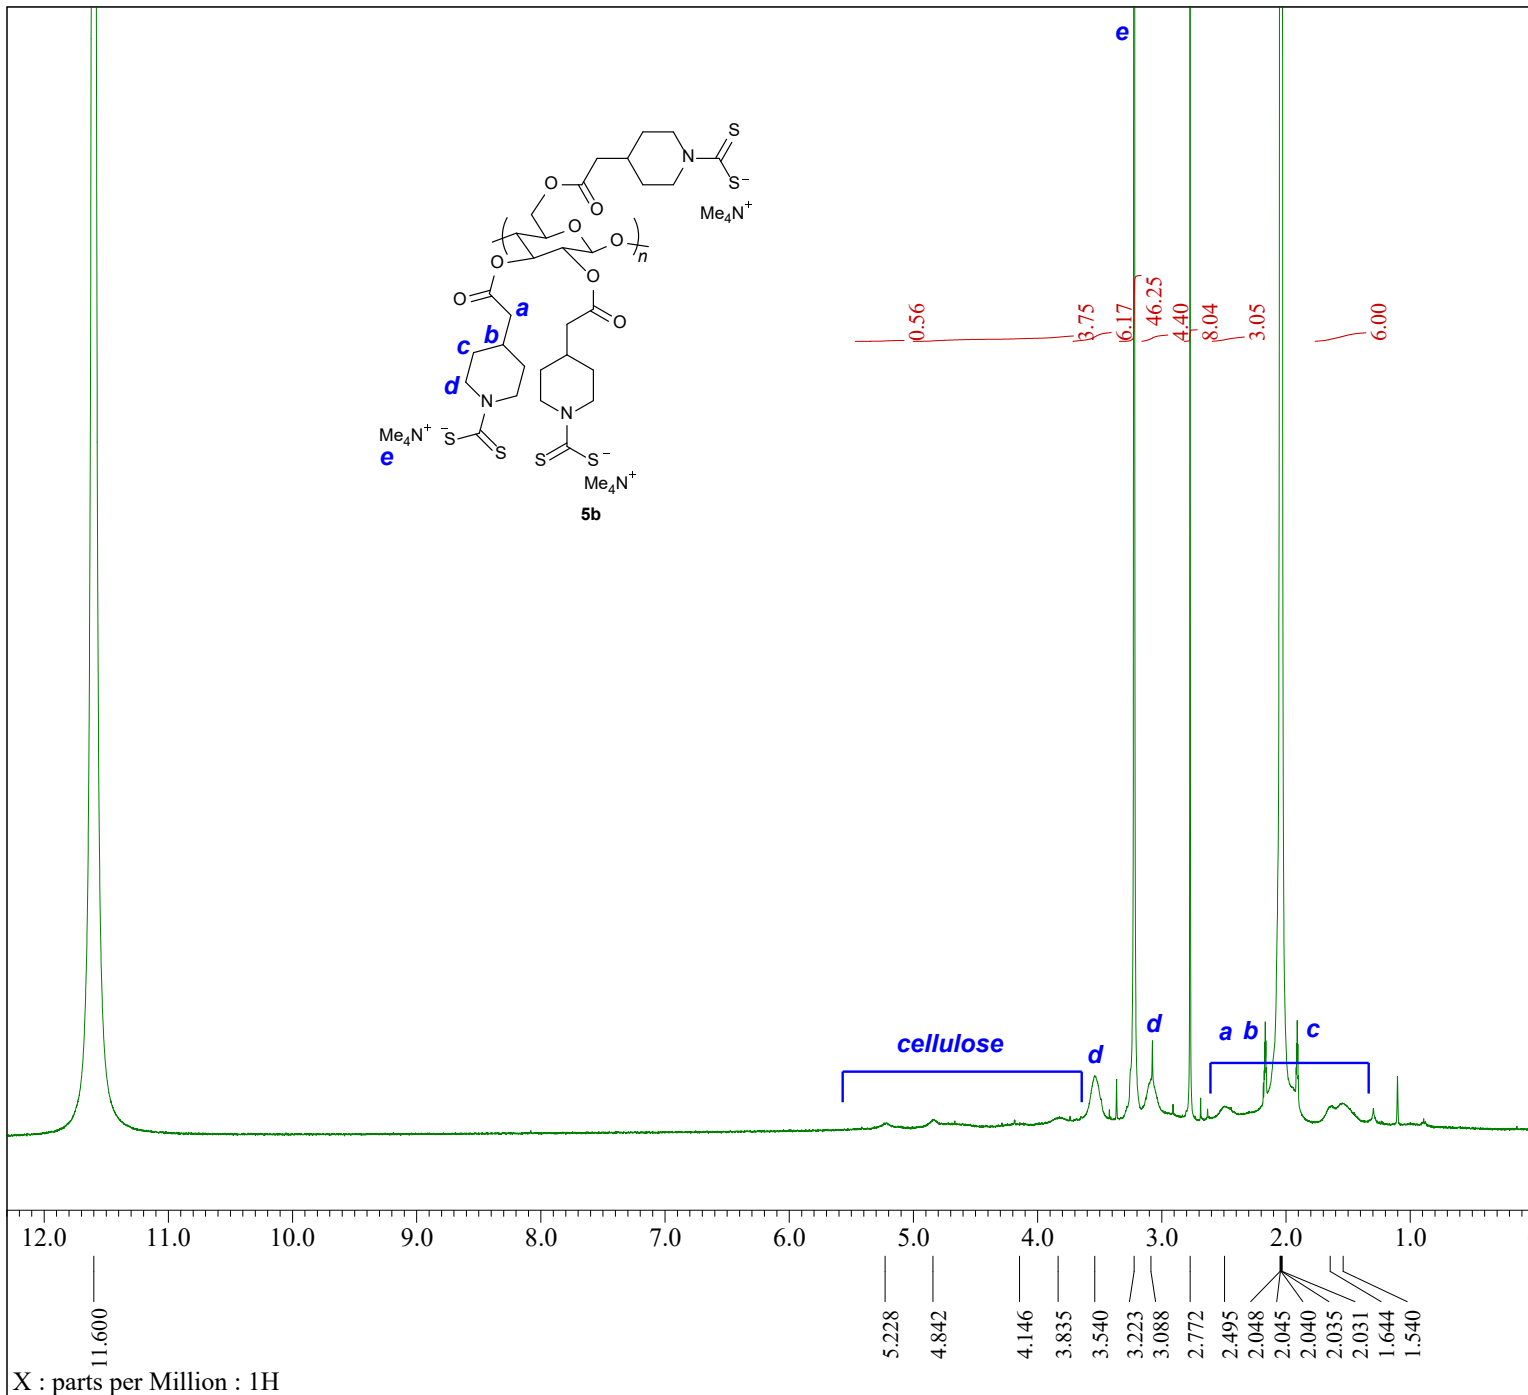

Filename = FM30-cel-pa-dtc-dry-7.jdf  
 Author = delta  
 Experiment = single\_pulse.ex2  
 Sample\_Id = S#714873  
 Solvent = ACETIC\_ACID-D3  
 Creation\_Time = 18-JUL-2019 20:03:18  
 Revision\_Time = 4-JUN-2020 16:05:15  
 Current\_Time = 4-JUN-2020 16:08:45

Data\_Format = 1D COMPLEX  
 Dim\_Size = 13107  
 Dim\_Title = 1H  
 Dim\_Units = [ppm]  
 Dimensions = X  
 Site = ECA 500  
 Spectrometer = JNM-ECA500

Field\_Strength = 11.7473579 [T] (500 [MHz])  
 X\_Acq\_Duration = 1.74587904 [s]  
 X\_Domain = 1H  
 X\_Freq = 500.15991521 [MHz]  
 X\_Offset = 5.0 [ppm]  
 X\_Points = 16384  
 X\_Prescans = 1  
 X\_Resolution = 0.57277737 [Hz]  
 X\_Sweep = 9.38438438 [kHz]  
 Irr\_Domain = 1H  
 Irr\_Freq = 500.15991521 [MHz]  
 Irr\_Offset = 5.0 [ppm]  
 Tri\_Domain = 1H  
 Tri\_Freq = 500.15991521 [MHz]  
 Tri\_Offset = 5.0 [ppm]  
 Clipped = FALSE  
 Scans = 256  
 Total\_Scans = 256

Relaxation\_Delay = 2 [s]  
 Recvr\_Gain = 50  
 Temp\_Get = 21 [dC]  
 X\_90\_Width = 11.6 [us]  
 X\_Acq\_Time = 1.74587904 [s]  
 X\_Angle = 45 [deg]  
 X\_Atn = 3.6 [dB]  
 X\_Pulse = 5.8 [us]  
 Irr\_Mode = Off  
 Tri\_Mode = Off  
 Dante\_Presat = FALSE  
 Initial\_Wait = 1 [s]  
 Repetition\_Time = 3.74587904 [s]

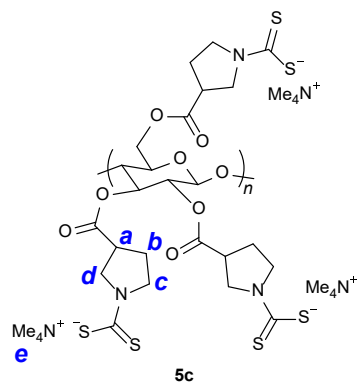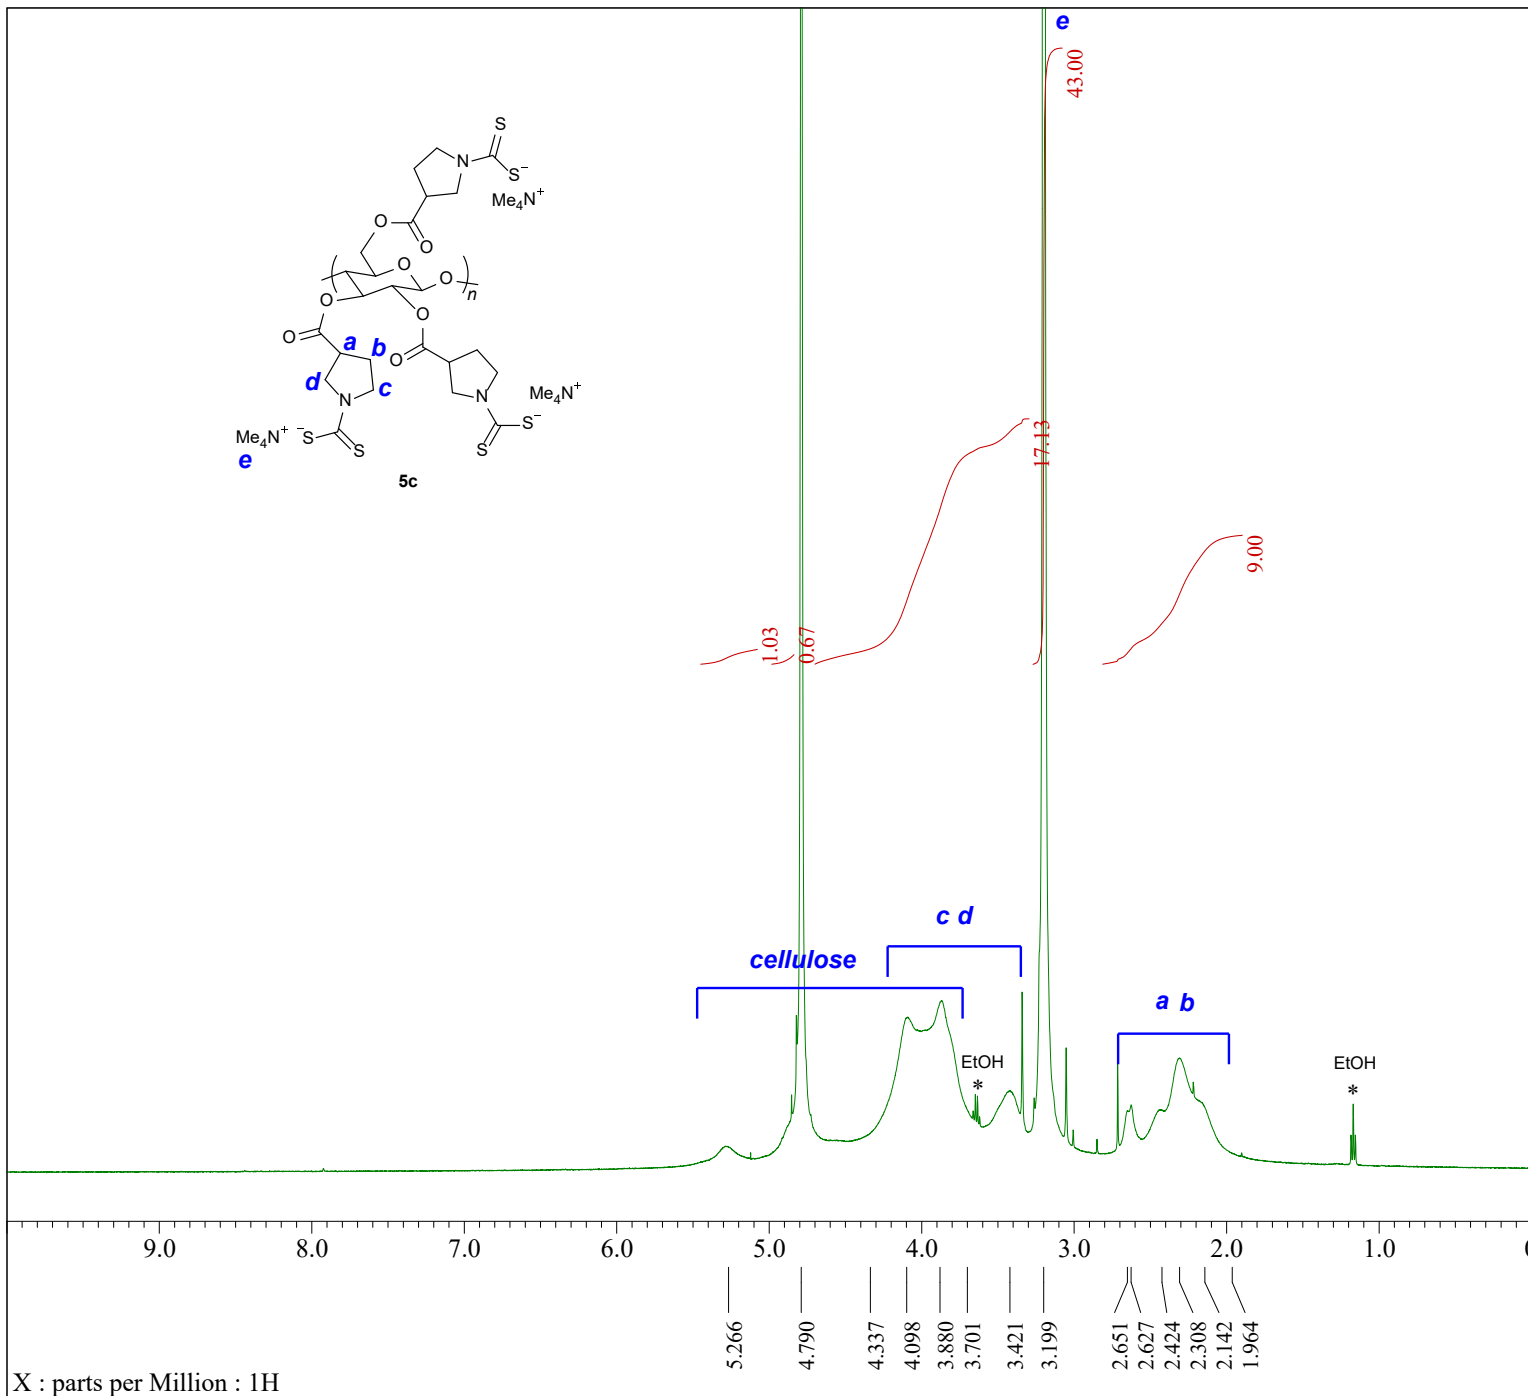

Filename = FM36-cel-prc-dtc-r.t.-4.jd  
 Author = delta  
 Experiment = single\_pulse.ex2  
 Sample\_Id = S#499551  
 Solvent = D2O  
 Creation\_Time = 13-SEP-2019 14:04:50  
 Revision\_Time = 4-JUN-2020 22:44:01  
 Current\_Time = 4-JUN-2020 22:44:06

Comment = FM36-cel-prc-dtc-r.t.  
 Data\_Format = 1D\_COMPLEX  
 Dim\_Size = 13107  
 Dim\_Title = 1H  
 Dim\_Units = [ppm]  
 Dimensions = X  
 Site = ECA 500  
 Spectrometer = JNM-ECA500

Field\_Strength = 11.7473579[T] (500[MHz])  
 X\_Acq\_Duration = 1.74587904[s]  
 X\_Domain = 1H  
 X\_Freq = 500.15991521[MHz]  
 X\_Offset = 5.0[ppm]  
 X\_Points = 16384  
 X\_Prescans = 1  
 X\_Resolution = 0.57277737[Hz]  
 X\_Sweep = 9.38438438[kHz]  
 Irr\_Domain = 1H  
 Irr\_Freq = 500.15991521[MHz]  
 Irr\_Offset = 5.0[ppm]  
 Tri\_Domain = 1H  
 Tri\_Freq = 500.15991521[MHz]  
 Tri\_Offset = 5.0[ppm]  
 Clipped = FALSE  
 Scans = 256  
 Total\_Scans = 256

Relaxation\_Delay = 2[s]  
 Recvr\_Gain = 46  
 Temp\_Get = 21.6[dc]  
 X\_90\_Width = 11.6[us]  
 X\_Acq\_Time = 1.74587904[s]  
 X\_Angle = 45[deg]  
 X\_Atn = 3.6[dB]  
 X\_Pulse = 5.8[us]  
 Irr\_Mode = Off  
 Tri\_Mode = Off  
 Dante\_Presat = FALSE  
 Initial\_Wait = 1[s]  
 Repetition\_Time = 3.74587904[s]

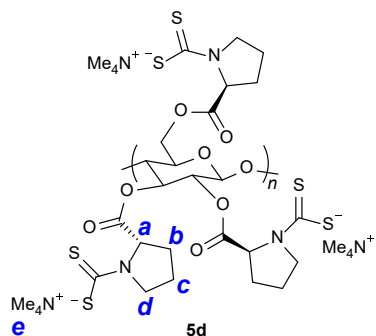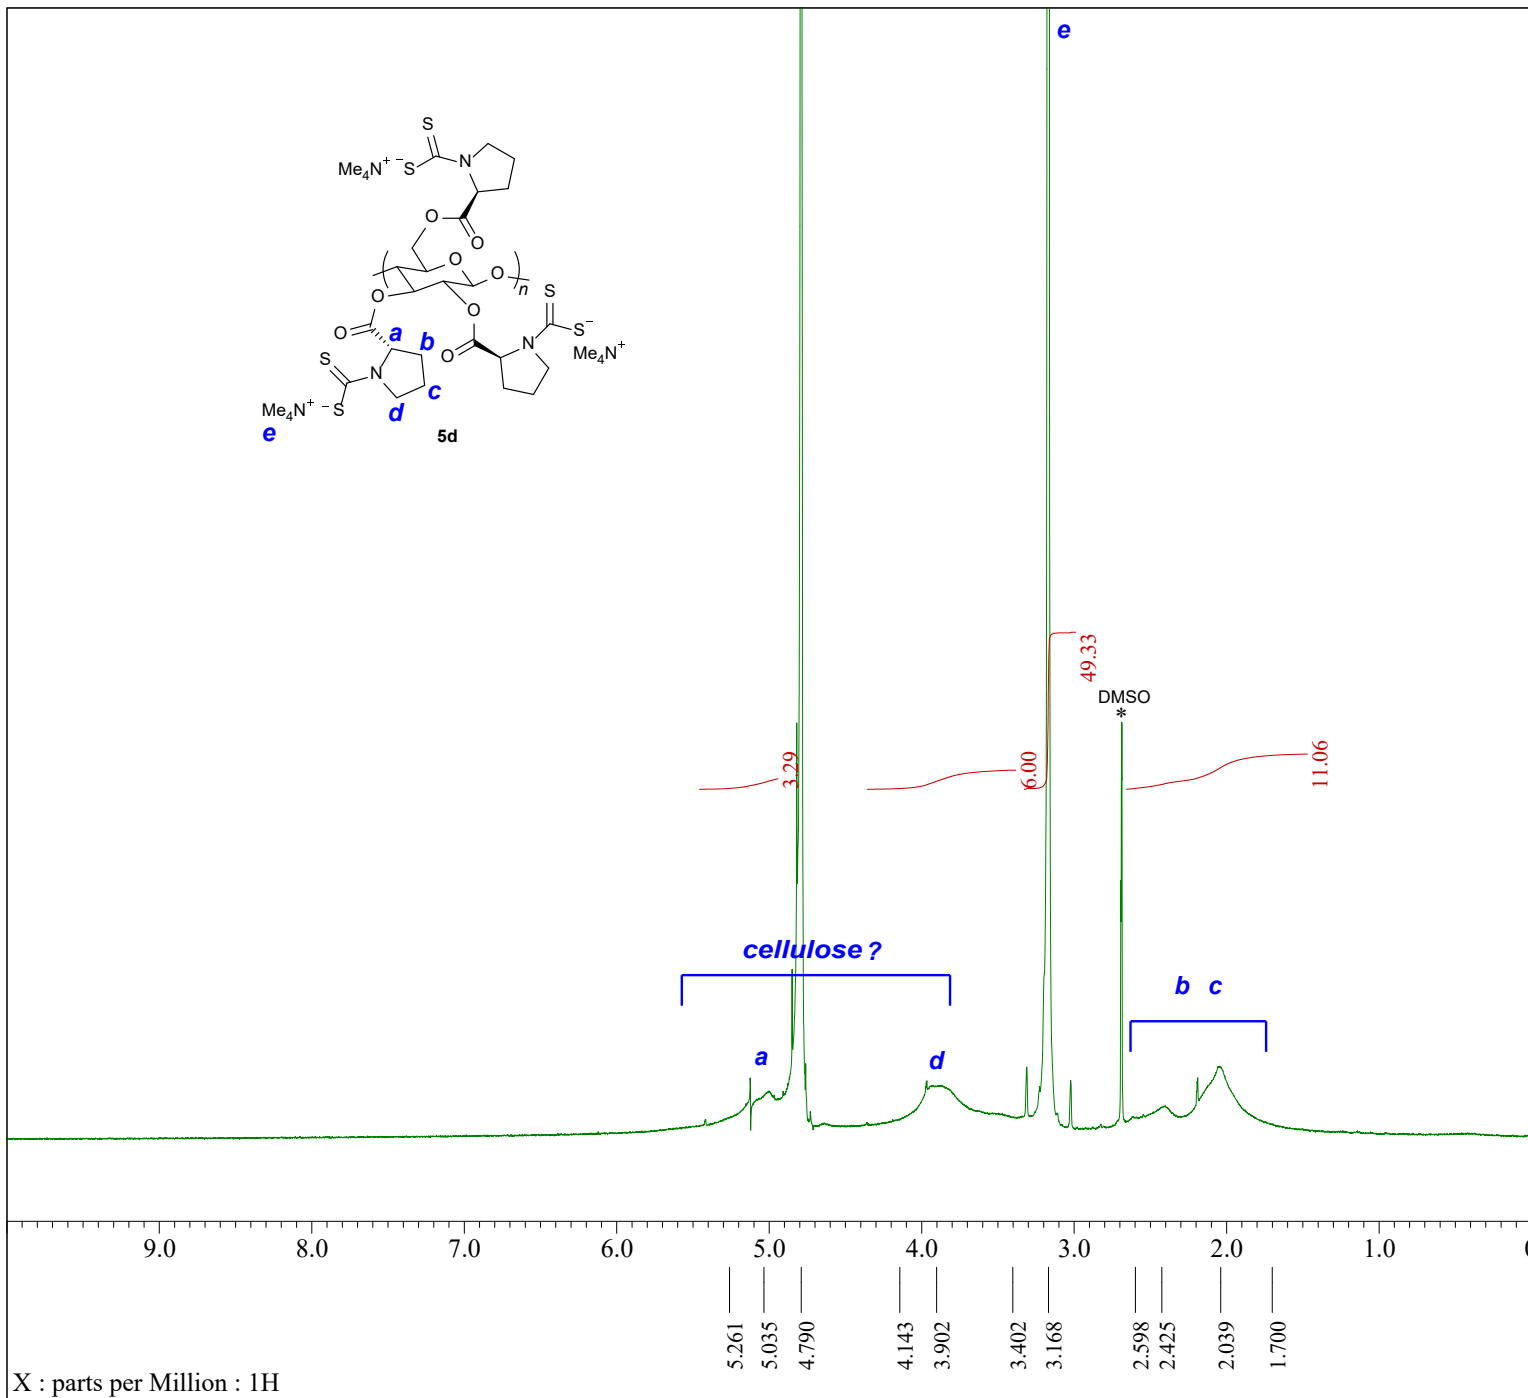

Filename = FM78-cel-pro-dtc-powder-dr  
 Author = delta  
 Experiment = single\_pulse.ex2  
 Sample\_Id = S#543947  
 Solvent = D2O  
 Creation\_Time = 13-FEB-2020 15:06:05  
 Revision\_Time = 4-JUN-2020 22:53:48  
 Current\_Time = 4-JUN-2020 22:54:14

Data\_Format = 1D COMPLEX  
 Dim\_Size = 13107  
 Dim\_Title = 1H  
 Dim\_Units = [ppm]  
 Dimensions = X  
 Site = ECA 500  
 Spectrometer = JNM-ECA500

Field\_Strength = 11.7473579[T] (500[MHz])  
 X\_Acq\_Duration = 1.74587904[s]  
 X\_Domain = 1H  
 X\_Freq = 500.15991521 [MHz]  
 X\_Offset = 5.0 [ppm]  
 X\_Points = 16384  
 X\_Prescans = 1  
 X\_Resolution = 0.57277737 [Hz]  
 X\_Sweep = 9.38438438 [kHz]  
 Irr\_Domain = 1H  
 Irr\_Freq = 500.15991521 [MHz]  
 Irr\_Offset = 5.0 [ppm]  
 Tri\_Domain = 1H  
 Tri\_Freq = 500.15991521 [MHz]  
 Tri\_Offset = 5.0 [ppm]  
 Clipped = FALSE  
 Scans = 256  
 Total\_Scans = 256

Relaxation\_Delay = 2[s]  
 Recvr\_Gain = 50  
 Temp\_Get = 20[dC]  
 X\_90\_Width = 11.6[us]  
 X\_Acq\_Time = 1.74587904[s]  
 X\_Angle = 45[deg]  
 X\_Atn = 3.6[dB]  
 X\_Pulse = 5.8[us]  
 Irr\_Mode = Off  
 Tri\_Mode = Off  
 Dante\_Presat = FALSE  
 Initial\_Wait = 1[s]  
 Repetition\_Time = 3.74587904[s]
